# Supplementary material for: Fluorination on cyclopentadithiophene-based hole-transport materials for high-performance perovskite solar cells
Source: Royal Society of Chemistry journal article supplement (doi:10.1039/d3cc04699k), 2023-01-01
Supplement: d3cc04699k1.pdf [file d3cc04699k1.pdf]

## Supporting Information

### Fluorination on cyclopentadithiophene-based hole-transport material for high-performance perovskite solar cells

Gizachew Belay Adugna,<sup>‡a,b</sup> Kun-Mu Lee,<sup>‡\*c,d,e,f</sup> Hsiao-Chi Hsieh,<sup>\*g</sup> Shih-I Lu,<sup>\*a</sup> Yu-Chien Hsieh,<sup>a</sup> June Hung Yang,<sup>a</sup> Wei-Hao Chiu,<sup>c,e</sup> Kang-Ling Liao,<sup>h</sup> Yu-Tai Tao<sup>b</sup> and Yan-Duo Lin<sup>\*a</sup>

<sup>a</sup>Department of Chemistry, Soochow University, Taipei 11102, Taiwan

<sup>b</sup>Institute of Chemistry, Academia Sinica, Taipei 115024, Taiwan

<sup>c</sup>Department of Chemical and Materials Engineering, Chang Gung University, Taoyuan 33302, Taiwan

<sup>d</sup>Division of Neonatology, Department of Pediatrics, Chang Gung Memorial Hospital, Linkou Taoyuan 33305, Taiwan

<sup>e</sup>Center for Sustainability and Energy Technologies, Chang Gung University, Taoyuan 33302, Taiwan

<sup>f</sup>College of Environment and Resources, Ming Chi University of Technology, New Taipei City, 24301, Taiwan

<sup>g</sup>Department of Applied Materials Science and Technology, Minghsin University of Science and Technology, Hsinchu, Taiwan

<sup>h</sup>Department of Chemistry, National Central University, Taoyuan 32001, Taiwan

‡ These authors contributed equally to this work.

Email: ydlin@scu.edu.tw

## Materials and Reagents

All solvents and chemicals were purchased from Aldrich, with the purity more than 98%. The thin-layer chromatography (TLC) was conducted with Merck KGaA precoated TLC Silica gel 60F254 on aluminum sheets. Flash column chromatography was performed on glass columns packed with silica gel using Silicycle UltraPure SilicaFlash P60, 40–63 mm (230–400 mesh). Unless otherwise specified, all reactions and manipulations were carried out under a nitrogen atmosphere. Solvents of reagent grade were used for syntheses and those of spectroscopy grade for spectra measurements. Solvents were dried by standard procedures. Compounds **1**, **2**, **3**, **4**, **5**, **6**, **7**, and **8** have been previously reported. [1,2]

## Characterization

$^1\text{H}$  and  $^{13}\text{C}$  NMR spectra were recorded on a Bruker 500 MHz spectrometer. Fast atom bombardment (FAB) mass spectra were recorded on a Jeol JMS 700 double-focusing spectrometer. UV spectra were measured on a Jasco V-530 double beam spectrophotometer. Fluorescence spectra were recorded on a Hitachi F-4500 fluorescence spectrophotometer. Cyclic voltammetry experiments were performed with a CHI-621A electrochemical analyzer. All measurements were carried out at room temperature with a conventional three-electrode configuration that consisted of a platinum working electrode, an auxiliary electrode, and a non-aqueous  $\text{Ag}/\text{AgNO}_3$  reference electrode. The SEM images were obtained by using a field-emission scanning electron microscope (JEOL-7401). A Nano-Scope NS3A system (Digital Instrument) was used to obtain the AFM images of the surface morphologies and thicknesses of various thin films. X-ray photoelectron spectroscopy (XPS) was collected with a VG ESCA Scientific Theta Probe system with a monochromatic  $\text{Al K}\alpha$  source (1486.6 eV) operated under ultra-high vacuum ( $< 2.5 \times 10^{-10}$  Torr) and analyzed by XPSPEAKS41 software. In addition, charge neutralization was used during all measurements. All binding energy were calibrated by shifting the C 1s peak to 284.8 eV.

### Solar cell fabrication.

A tin oxide aqueous solution with a weight percentage of 3% was spin-coated onto the substrate at 3500 rpm for 30 seconds to form the SnO<sub>2</sub> electron transfer layer. This layer was then annealed at 150°C for 40 minutes and cooled to room temperature. After cooling to room temperature, the substrate was transferred to a nitrogen-filled glove box. Then, the perovskite (Cs<sub>0.05</sub>MA<sub>0.2</sub>FA<sub>0.75</sub>Pb(Br<sub>0.05</sub>I<sub>0.95</sub>)<sub>3</sub>) layer was prepared using a single-step method. The mixture of 576.3 mg of PbI<sub>2</sub> (99.9985%, Alfa Aesar, Harverhill, MA, USA), 161.2 mg of formamidinium iodide (FAI, 99.99%, FMPV<sup>®</sup>, FrontMaterials Co. Ltd., Taipei, Taiwan), 14 mg of methylammonium bromide (MABr, ECHO chemical, Miaoli, Taiwan), 16.2 mg of Cesium iodide (CsI, Aldrich, Burlington, VT, USA) and 19.8 mg of methylammonium iodide (CH<sub>3</sub>NH<sub>3</sub>I, MAI, > 98%, STAREK<sup>®</sup>, Starek Scientific Co. Ltd., Taipei, Taiwan) dissolved in 0.8 mL dimethylformamide (DMF, Tedia, OH, USA) and 0.2 mL Dimethyl sulfoxide (DMSO, 99%, Echo Chemical Co., Ltd., Miaoli, Taiwan) was stirred at 60 °C for 8 h and was coated onto the TiO<sub>2</sub> substrate by a two-step spin-coating process at 1000 and 5000 rpm for 10 and 20 sec, respectively. At the second spin-coating step, the substrate/films were treated with 75 μL toluene by drop-casting. The substrate was dried at 100 °C on a hot plate for 10 min. The YC molecules studied in this work were dissolved in chlorobenzene (40 mg/mL) and spin-coated on the substrate at 2000 rpm for 30 s. The solution of spiro-OMeTAD was prepared in chlorobenzene (40 mg/mL) and mixed with 17.5 μL solution of lithium bis-trifluoromethanesulfonimide (Li-TSFI, 520 mg in 1 mL acetonitrile) and 28.5 μL 4-*tert*-butylpyridine. The solution was spin-coated on substrate at 2000 rpm for 30 s. Finally, the Ag counter electrode (~100 nm) was deposited by thermal evaporation. The active area of the electrode was fixed at 0.16 cm<sup>2</sup>. *J-V* curves were recorded with a Keithley 2400 source meter under simulated AM 1.5G sunlight, calibrated to 100 mW/cm<sup>2</sup>. The reported device characteristics were estimated from the measured *J-V* curves.

## Solar cell performance measurement

Solar cell efficiencies were evaluated under simulated one sun irradiation from a Xe arc lamp with an AM 1.5 global filter. Irradiance was characterized using a calibrated spectrometer and illumination intensity was set using an NREL certified silicon diode with an integrated KG1 optical filter. Spectral mismatch factors were calculated for each device in this report to be less than 5%. IPCE spectra were measured in air using a commercial IPCE set-up (Enlitech, QE-R).

## Mobility measurements

In order to assess the potential of **YC-oF**, **YC-mF**, **YC-H** and spiro-OMeTAD as hole-transport materials, hole-only devices were fabricated with the device structure of ITO/PEDOT:PSS/HTM/Al. Hole mobilities were calculated by the space-charge-limited current (SCLC) method using the Mott–Gurney law, by fitting experimental data to equation (1) in the voltage range where the obtained slope in the double log plot is equal to 2.

$$J = \frac{9}{8} \epsilon_r \epsilon_0 \mu_h \frac{V^2}{d^3} \quad (1)$$

In equation (1),  $J$  is the current density,  $\epsilon_0$  is the permittivity of free space ( $8.85 \times 10^{-12}$  F m<sup>-1</sup>),  $\epsilon_r$  is the relative permittivity of the material (approaching 3 for organic semiconductors),  $\mu_h$  is the hole mobility,  $V$  is the applied voltage and  $d$  is the thickness of the active layer.

The hole-only devices were fabricated by spin-coating PEDOT:PSS (Clevios P, VP Al4083) onto pre-cleaned, patterned indium tin oxide (ITO) substrates (15  $\Omega$ /square) (Kintec). A film of the HTM was spin-coated on top from chloroform solution with a concentration of 40 mg mL<sup>-1</sup>. The film thickness was varied by using different spin-coating speeds. As a counter electrode, Al was deposited on top by vacuum evaporation. The current density–voltage curves of the devices were recorded with

a Keithley 2400 Source meter.

### **Computation method**

Ground-state geometries and the corresponding vertical excitation energies of the **YC-oF**, **YC-mF** and **YC-H** molecules in THF solution were studied computationally by performing APFD <sup>[4]</sup> and TD-APFD calculations, respectively, with the 6-31G(d,p) basis set via Gaussian 16 software package <sup>[5]</sup>. The solvent effect was considered by the polarizable continuum model (PCM) <sup>[6]</sup>. To further study the interaction between perovskite and **YC** molecules, we conducted geometry optimization within the context of periodic boundary conditions (PBC) in which one molecule of **YC-oF**, **YC-mF** and **YC-H** was placed over the perovskite surface of 4x4x2 cell. The density functional based tight binding method using the GFN1-xTB <sup>[7]</sup> parametrization of the extended tight-binding (xTB) model Hamiltonian was employed. We used the DFTB engine <sup>[8]</sup> implemented in the Amsterdam Modeling Suite (AMS) 2022 <sup>[9]</sup> to perform the calculations.

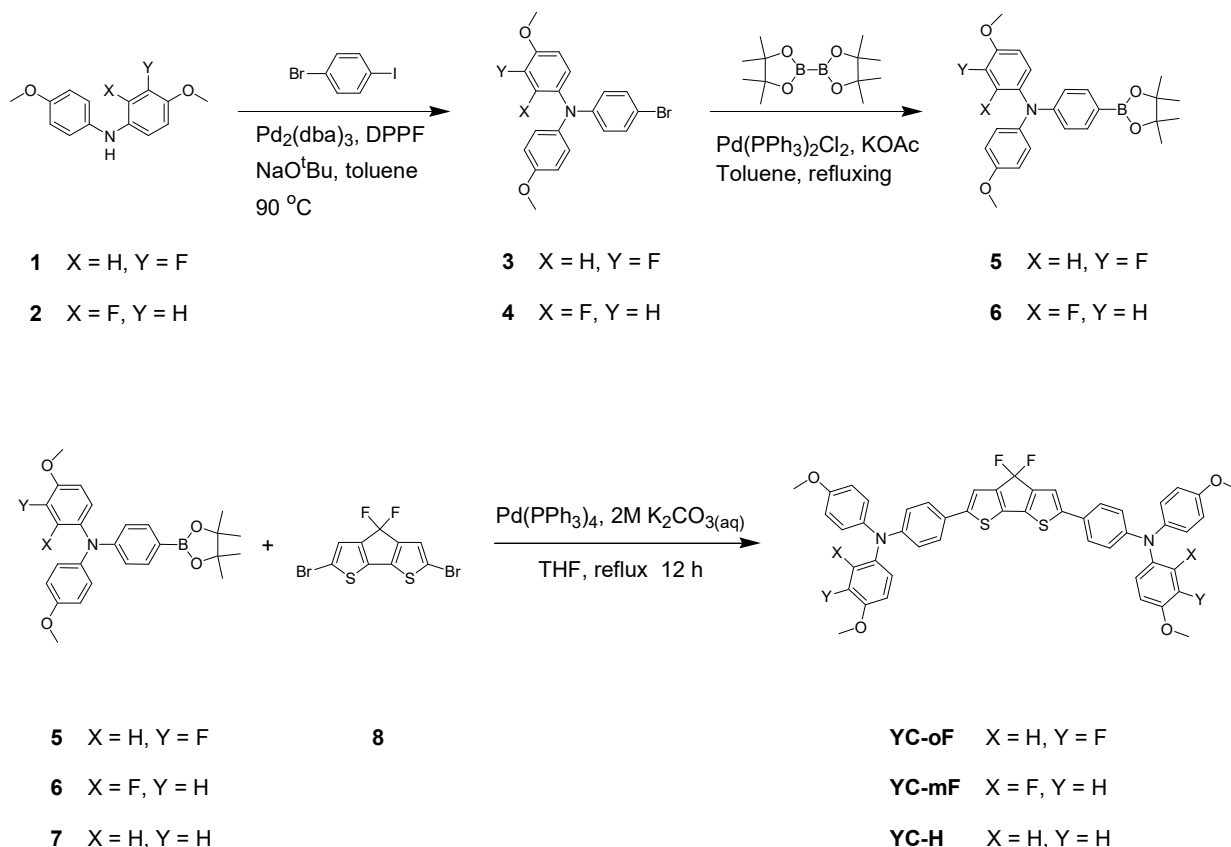

**Scheme S1.** Synthetic procedures for **YC-oF**, **YC-mF**, and **YC-H**.

**Synthesis of YC-oF:** A heterogeneous mixture of 2 M  $K_2CO_3$  (2 mL), THF (3 mL), **8** (0.18 g, 0.48 mmol), **5** (0.5 g, 1.11 mmol), and  $Pd(PPh_3)_4$  (0.036 g, 8 mol %) under argon was heated at 80 °C for 12 h. The mixture was extracted with  $CH_2Cl_2$ . The organic layer was separated and dried over anhydrous  $MgSO_4$ . Evaporation of the solvent gave a crude product, which was purified by silica gel column chromatography using  $CH_2Cl_2$ /hexane (1/1) as eluent to afford the desired product as a red solid in 78% yield. mp 135-136 °C;  $^1H$  NMR (500 MHz,  $CDCl_3$ ):  $\delta$  7.32 (d,  $J = 8.5$ , 4H), 7.-15-7.09 (m, 8H), 6.84 (d,  $J = 8.5$ , 4H), 6.77 (d,  $J = 8.5$ , 4H), 6.70-6.66 (m, 4H), 3.79 (s, 6H), 3.79 (s, 6H) ppm;  $^{13}C$  NMR (125 MHz,  $CDCl_3$ ):  $\delta$  160.41, 158.80, 158.72, 158.42, 156.63, 148.44, 147.59, 145.21, 145.00, 144.78, 139.57, 138.12, 138.07, 130.62, 130.60, 126.88, 126.79, 126.59, 126.29, 125.86, 118.27, 115.64, 114.95, 110.96, 110.94, 103.40, 103.22, 55.95, 55.69 ppm.;  $^{19}F$  NMR (376 MHz,  $DMSO-d_6$ ):  $\delta$  -117.41

(s, 2F), -120.52 (s, 2F). HRMS (FAB)  $m/z$   $[M+1^+]$  calcd for  $C_{49}H_{36}F_4N_2O_4S_2$ : 856.2053; found: 856.2044.

**Synthesis of *YC-mF*:** *YC-mF* was synthesized according to the same procedure as that of *YC-oF*. The product was obtained in 76% yield. mp 132-134 °C;  $^1H$  NMR (500 MHz,  $CDCl_3$ ):  $\delta$  7.34 (d,  $J = 8.5$ , 4H), 7.15 (s, 2H), 7.04 (d,  $J = 8.5$ , 4H), 6.92 (d,  $J = 8.5$ , 4H), 6.86-6.80 (m, 10H), 3.86 (s, 6H), 3.79 (s, 6H) ppm;  $^{13}C$  NMR (125 MHz,  $CDCl_3$ ):  $\delta$  156.76, 153.88, 151.92, 148.19, 147.38, 145.36, 145.14, 144.92, 144.04, 143.96, 141.24, 141.18, 140.11, 138.37, 127.38, 126.96, 126.32, 121.41, 120.27, 120.25, 115.97, 115.15, 114.42, 113.24, 113.08, 56.89, 55.71 ppm.;  $^{19}F$  NMR (376 MHz, DMSO- $d_6$ ):  $\delta$  -120.51 (s, 2F), -132.75 (s, 2F). HRMS (FAB)  $m/z$   $[M+1^+]$  calcd for  $C_{49}H_{36}F_4N_2O_4S_2$ : 856.2053; found: 856.2048.

**Synthesis of *YC-H*:** *YC-H* was synthesized according to the same procedure as that of *YC-oF*. The product was obtained in 71% yield. mp 132-134 °C;  $^1H$  NMR (500 MHz,  $CDCl_3$ ):  $\delta$  7.32 (d,  $J = 8.5$ , 4H), 7.13 (s, 2H), 7.06 (d,  $J = 8.5$ , 8H), 6.88 (d,  $J = 8.5$ , 4H), 6.83 (d,  $J = 8.5$ , 8H), 3.78 (s, 12H) ppm;  $^{13}C$  NMR (125 MHz,  $CDCl_3$ ):  $\delta$  156.39, 148.85, 147.57, 145.05, 144.83, 140.61, 138.15, 127.06, 126.23, 120.38, 115.68, 115.00, 55.71 ppm.;  $^{19}F$  NMR (376 MHz, DMSO- $d_6$ ):  $\delta$  -120.51 (s, 2F); HRMS (FAB)  $m/z$   $[M+1^+]$  calcd for  $C_{49}H_{38}F_2N_2O_4S_2$ : 820.2241; found: 820.2248.

```

Current Data Parameters
NAME      YDE230615
EXPNO     1
PROCNO    1

F2 - Acquisition Parameters
Date_     20230615
Time     12.02 h
INSTRUM   Avance NEO 500
PROBHD    Z122624_0023 (
PULPROG   zg30
TD         32768
SOLVENT   CDCl3
NS         16
DS         10
SRH        9090.909 Hz
FIDRES     0.554865 Hz
AQ         1.6022400 sec
RG         64
DN         55.000 usec
DE         10.00 usec
TE         296.0 K
D1         2.00000000 sec
T1         500.2035011 MHz
SFO1       500.2035011 MHz
NUC1       1H
F0         4.00 usec
F1         12.00 usec
PLW1       14.87899971 W

F2 - Processing parameters
SI         32768
SF         500.2000231 MHz
WDW        no
SSB        0
LB         0 Hz
GB         0
PC         1.00

```

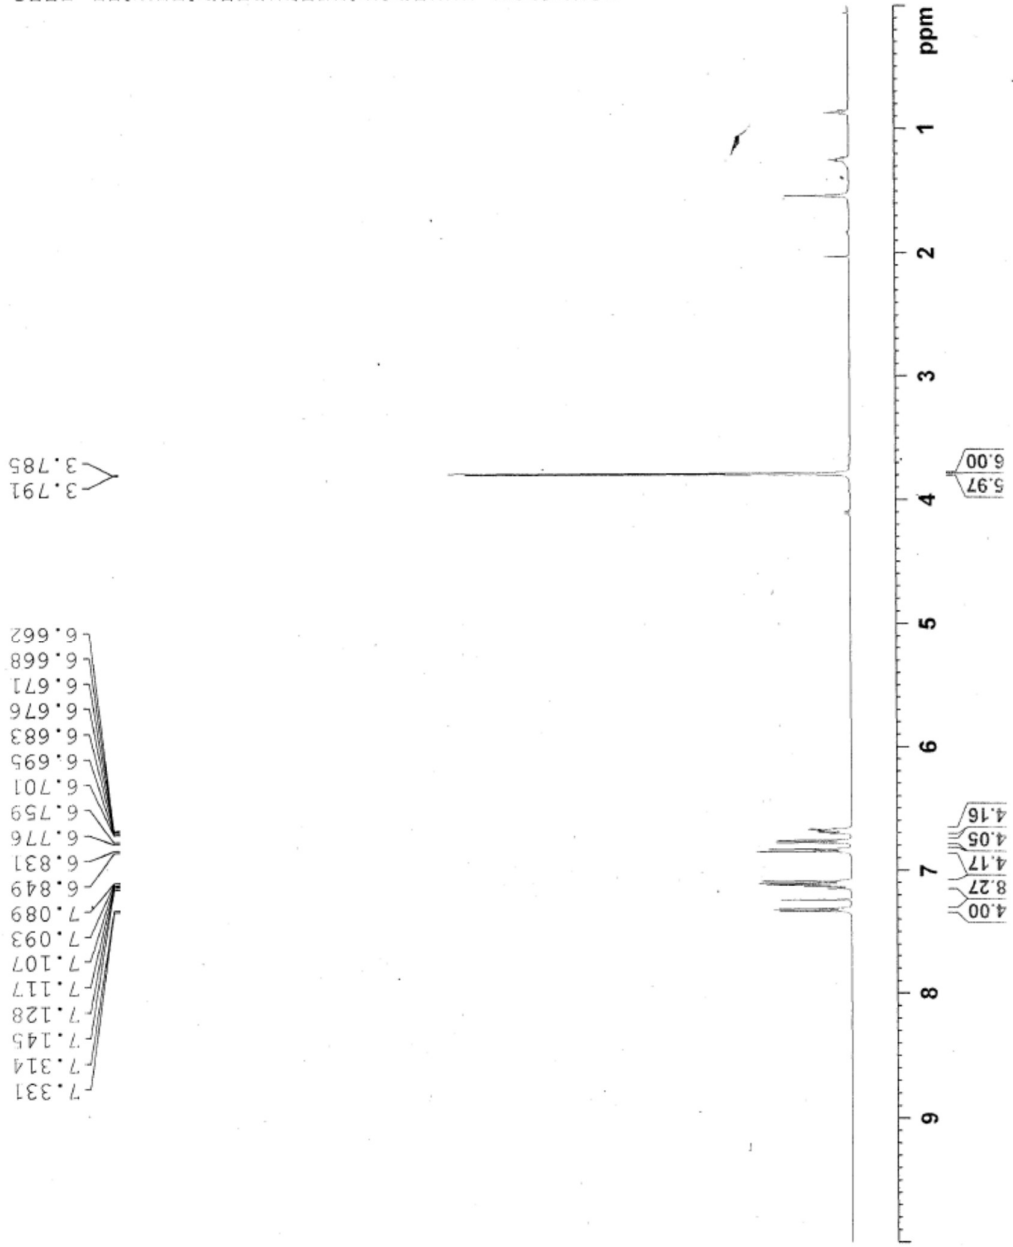

Figure S1. <sup>1</sup>H NMR spectrum of compound YC-oF.



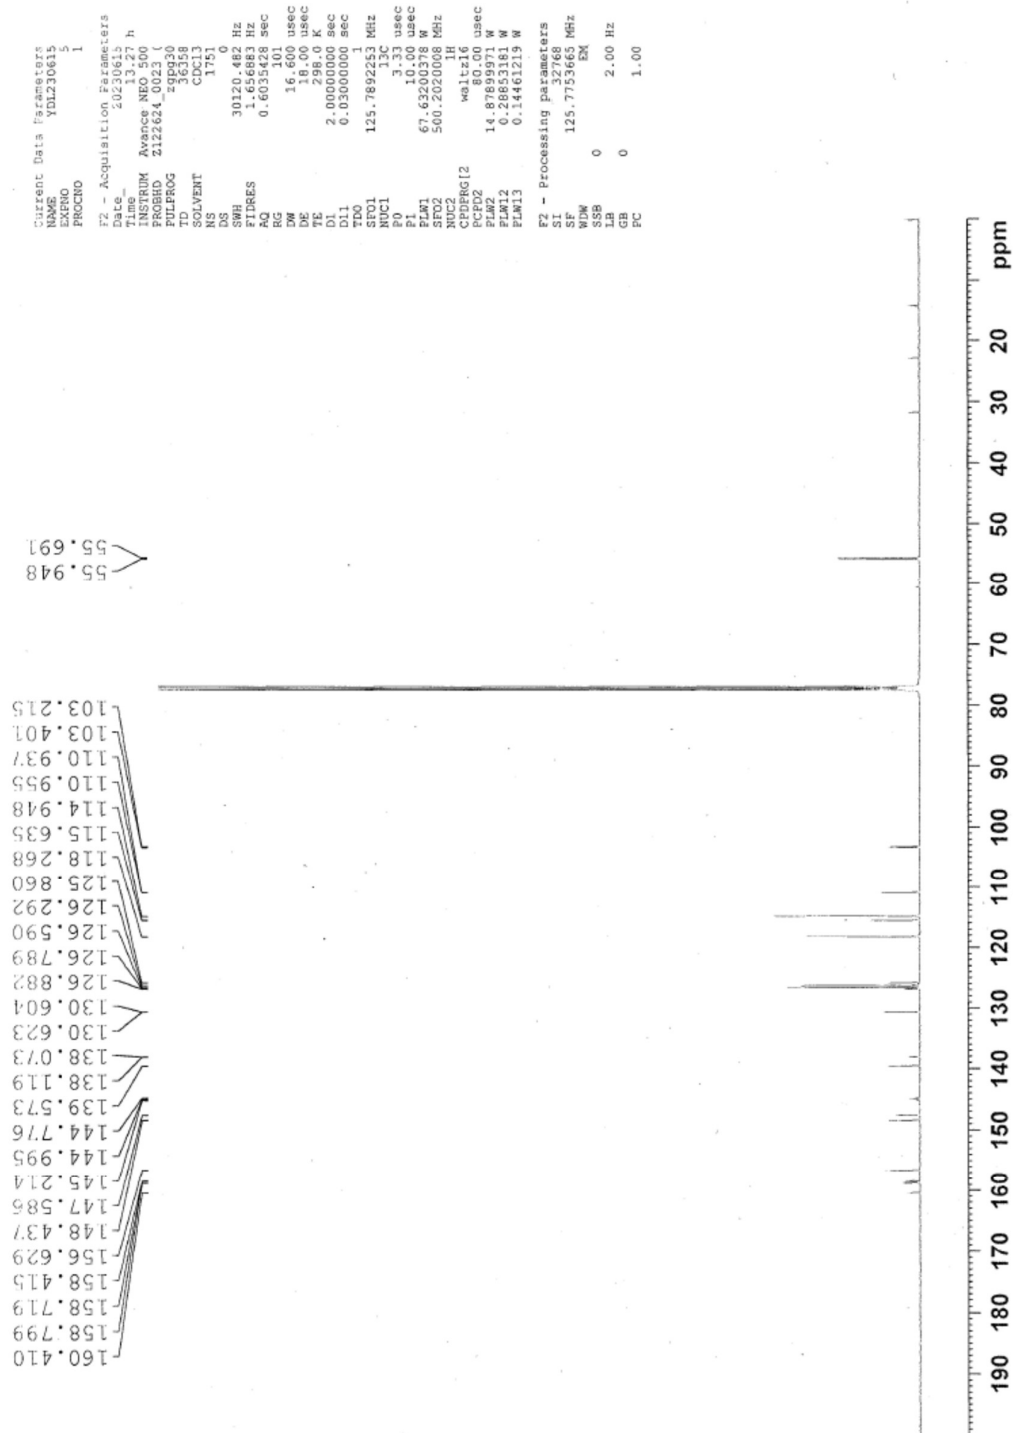

Figure S2. <sup>13</sup>C NMR spectrum of compound YC-oF.

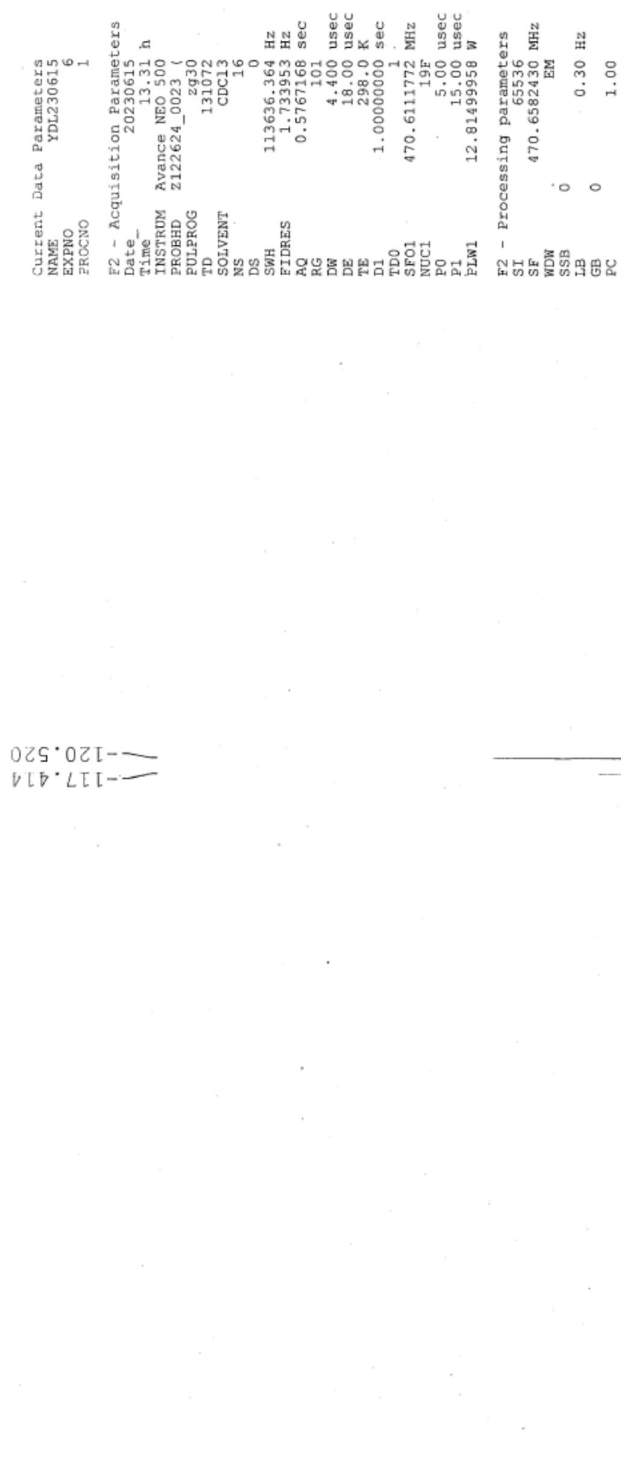

Figure S3. <sup>19</sup>F NMR spectrum of compound YC-oF.

```

Current Data Parameters
NAME      YDL230615
EXPNO     1
PROCNO    1

F2 - Acquisition Parameters
Date_     20230615
Time      11.41 h
INSTRUM   Avance NEO 500
PROBHD    Z122624_0023 (
PULPROG   zg30
TD         32768
SOLVENT   CDCl3
NS         16
DS         0
SWH        9090.909 Hz
FIDRES     0.554865 Hz
AQ         1.802400 sec
RG         45.2
DW         55.000 usec
DE         10.00 usec
TE         298.0 K
D1         2.00000000 sec
TDO        1
SF01       500.2035014 MHz
NUC1       1H
P0         4.00 usec
P1         12.00 usec
PLW1       14.87899971 W

F2 - Processing parameters
SI         32768
SF         500.2000235 MHz
WDW        no
SSB        0 Hz
LB         0 Hz
GB         0
PC         1.00

```

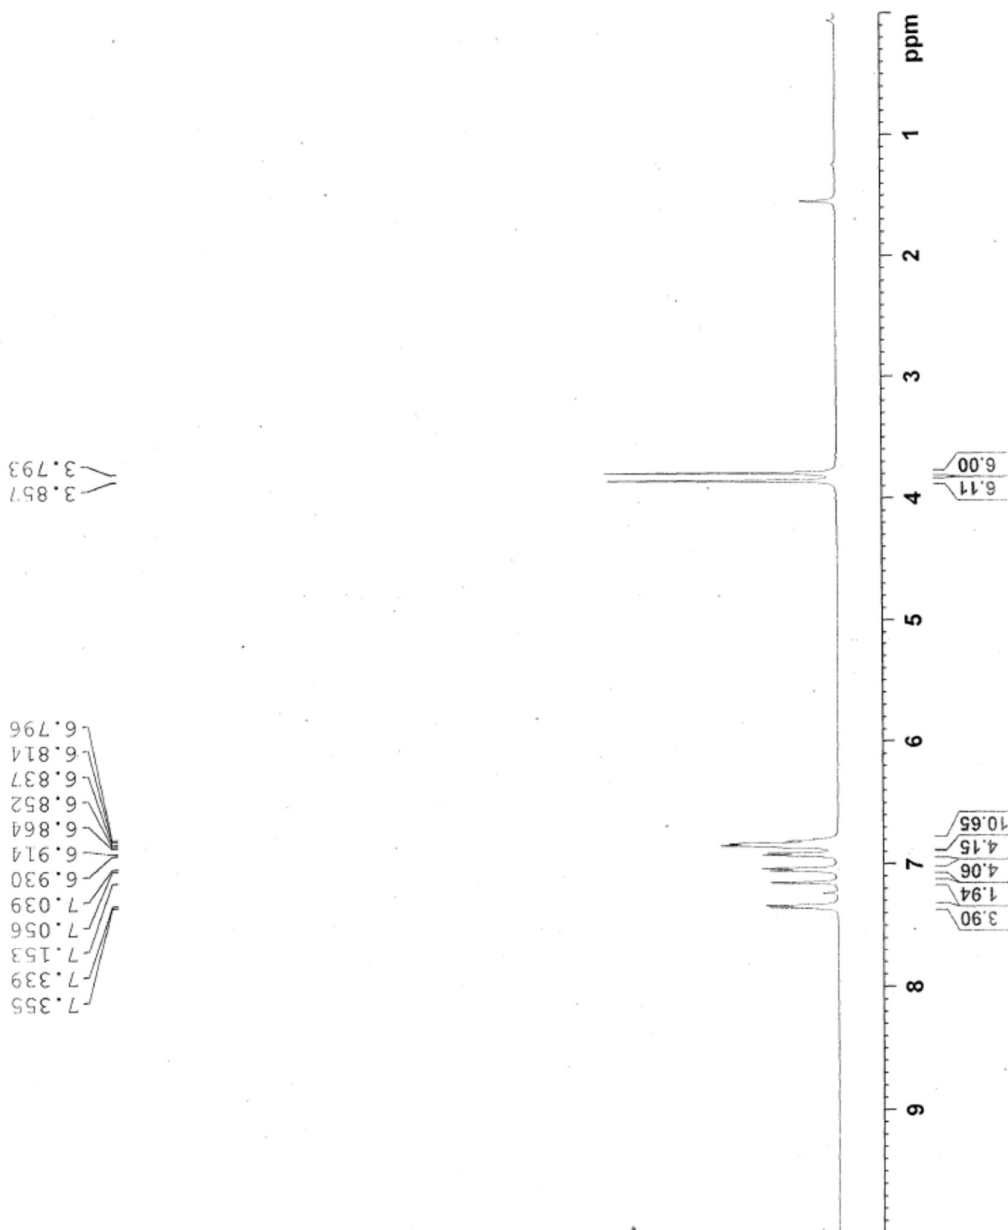

Figure S4. <sup>1</sup>H NMR spectrum of compound YC-mF.

Current Data Parameters  
 NAME YDL230615  
 EXENO 3  
 PROCNO 1

F2 - Acquisition Parameters  
 Date 20230615  
 Time 11.56 h  
 INSTRUM Avance NEO 500  
 PROBDH Z12262\_0023 ( )  
 PULPROG zgpg30  
 TD 65536  
 SOLVENT CDCl3  
 NS 182  
 DS 0

SWH 30120.482 Hz  
 FIDRES 1.65683 Hz  
 AQ 0.6035428 sec  
 RG 0.00000000  
 DE 16.00 usec  
 TE 298.0 K  
 D1 2.00000000 sec  
 D11 0.03000000 sec  
 TDD 0.00000000 sec  
 SFO1 125.769213 MHz  
 PC1 3.33 usec  
 P1 10.00 usec  
 PLW1 67.63200378 W  
 SFO2 500.2020008 MHz  
 PLW2 500.2020008 W  
 NUC2 1H  
 SFO2 400.1462003 MHz  
 PC2 14.87695971 usec  
 PLW2 14.87695971 W  
 SFO3 0.28653181 MHz  
 PLW3 0.28653181 W  
 SFO4 0.14461219 MHz  
 PLW4 0.14461219 W

F2 - Processing parameters  
 SI 32768  
 SF 125.7755662 MHz  
 EQ 31.00 usec  
 KW 0  
 SSB 0 2.00 Hz  
 LB 0  
 GB 0  
 PC 1.00

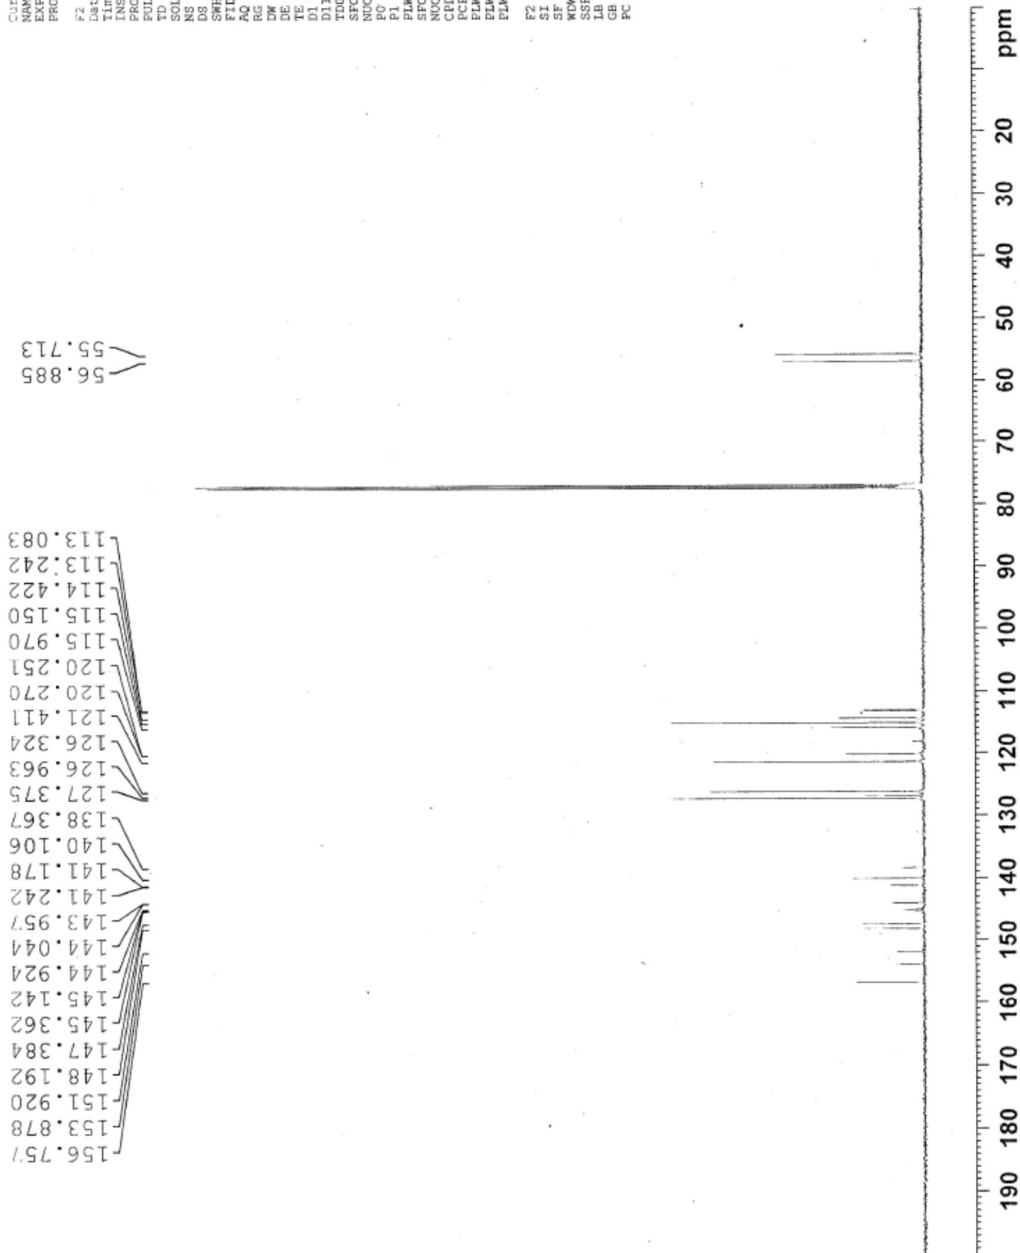

Figure S5. <sup>13</sup>C NMR spectrum of compound YC-mF.

Current Data Parameters  
 NAME YDL230615  
 EXENO 2  
 PROCNO 1

F2 - Acquisition Parameters  
 Date\_ 20230615  
 Time\_ 11:44 h  
 INSTRUM Avance NEO 600  
 PROBHD Z122624\_0023 (  
 PULPROG zgpg30  
 TD0 131072  
 SOLVENT CDCl3  
 NS 16  
 DS 0  
 SWH 113636.364 Hz  
 FIDRES 1.733953 Hz  
 AQ 0.5767168 sec  
 RG 32  
 DW 4.400 usec  
 DE 18.00 usec  
 TE 298.0 K  
 D1 1.00000000 sec  
 TD0 1  
 SF01 470.6111772 MHz  
 NUC1 19F  
 P0 5.00 usec  
 P1 15.00 usec  
 PLW1 12.81499958 W

F2 - Processing Parameters  
 SI 65536  
 SF 470.6582430 MHz  
 EM  
 WDW 0  
 SSB 0 0.30 Hz  
 GB 0  
 PC 1.00

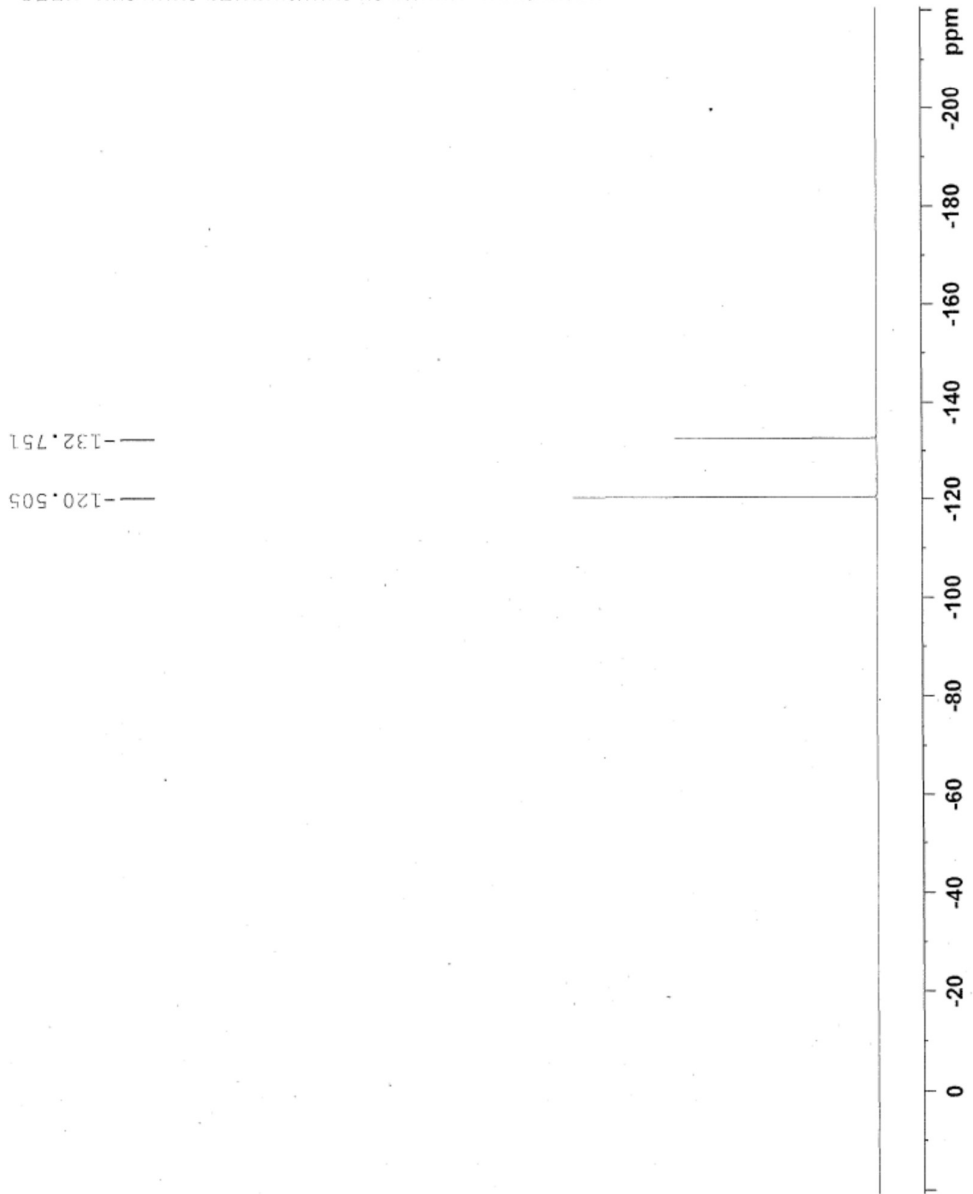

Figure S6. <sup>19</sup>F NMR spectrum of compound YC-mF.

```

Current Data Parameters
NAME      YDL230613
EXPNO    1
PROCNO   1

F2 - Acquisition Parameters
Date_    20230613
Time     1.39 h
INSTRUM  Avance NEO 500
PROBHD   Z12Z624_00230
PULPROG  zgpg30
TD       32768
SOLVENT  CDCl3
NS       0
DS       0
SWH      9090.909 Hz
FIDRES   0.554865 Hz
AQ       1.8022400 sec
RG       327.68
DSB      55.006 usec
DE       10.00 usec
TE       298.0 K
D1       2.00000000 sec
TD0      1
SF01     500.2035014 MHz
NUC1     1H
P0       4.00 usec
P1       12.00 usec
PLW1     14.87899971 W

F2 - Processing parameters
SI       32768
SF       500.2000242 MHz
WDW      no
SSB      0
LB       0 Hz
GB       0
PC       1.00

```

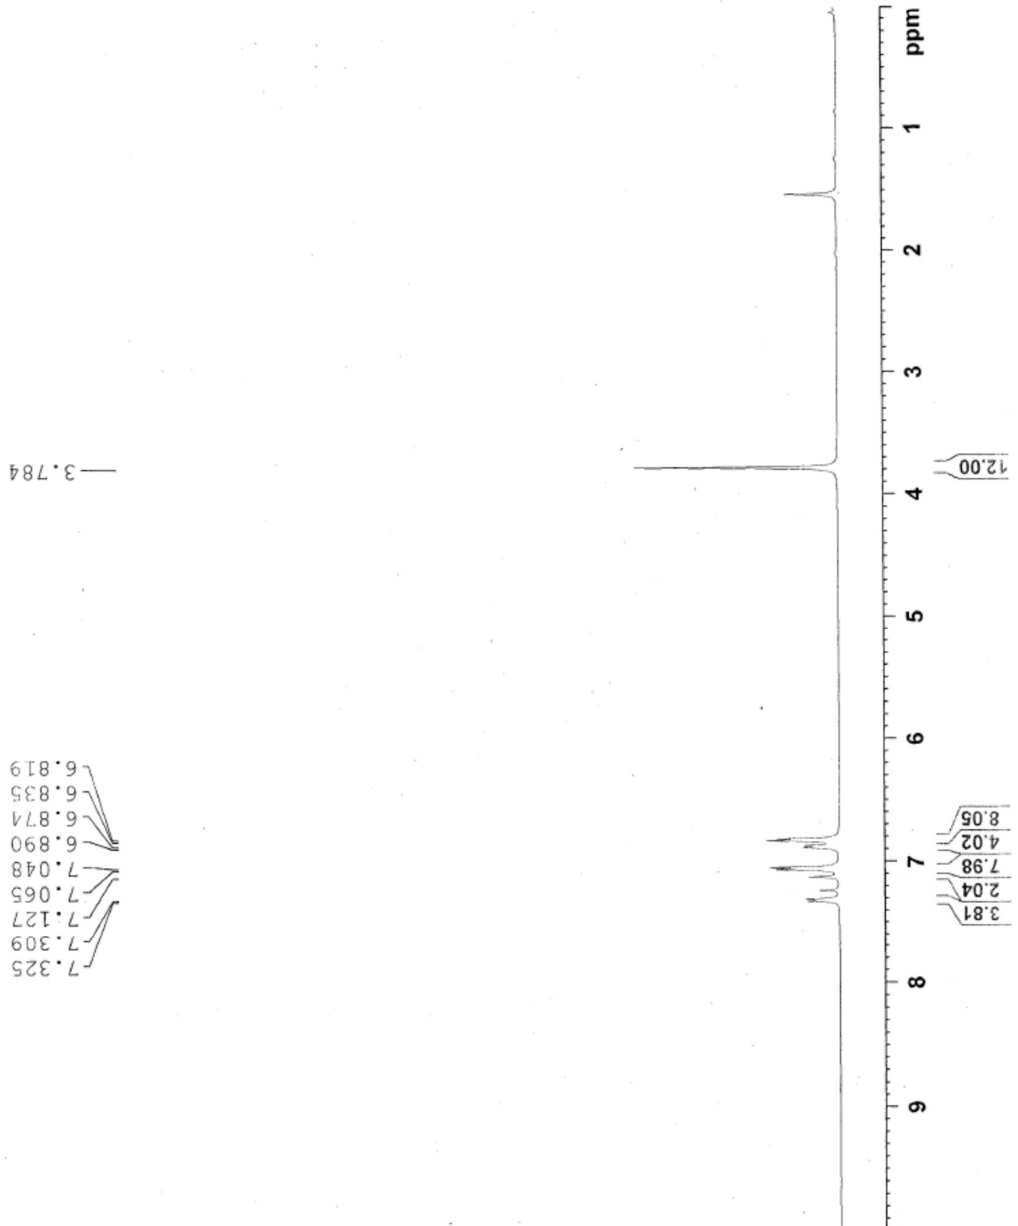

Figure S7. <sup>1</sup>H NMR spectrum of compound YC-H.

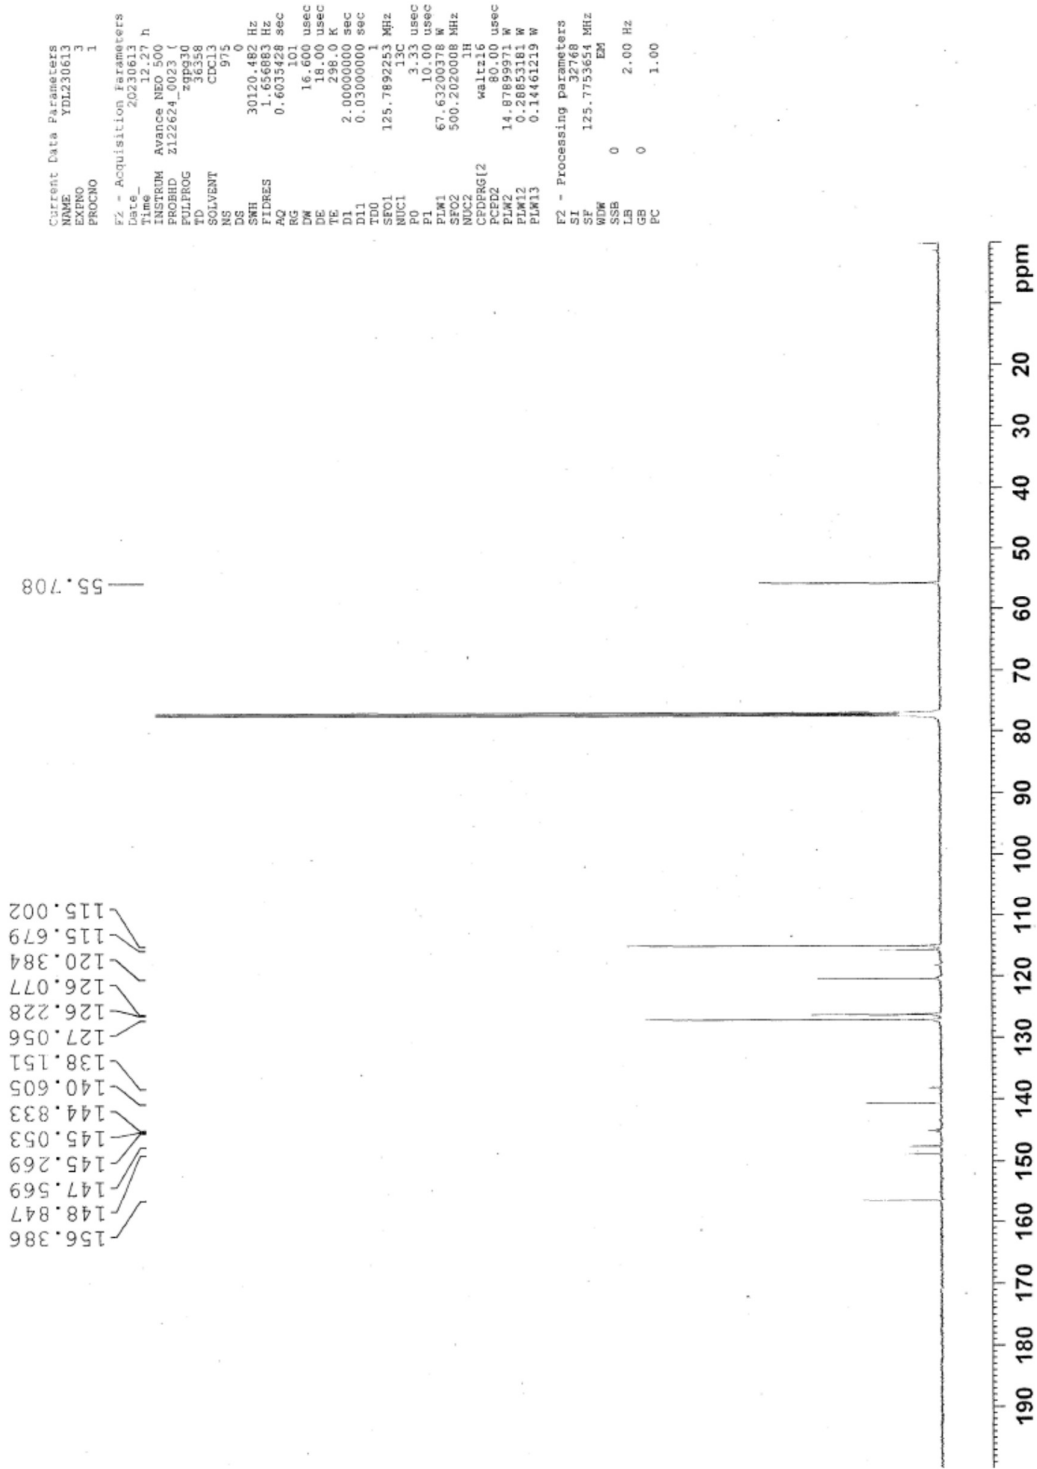

Figure S8. <sup>13</sup>C NMR spectrum of compound YC-H.

Current Data Parameters  
 NAME YDL230613  
 EXPNO 2  
 PROCNO 1

F2 - Acquisition Parameters  
 Date\_ 20230613  
 Time 11.42 h  
 INSTRUM Avance NEO 500  
 PROBHD Z122624 0023 (   
 PULPROG zg30  
 TD 131072  
 SOLVENT CDCl3  
 NS 9  
 DS 0  
 SWH 113636.364 Hz  
 FIDRES 1.733953 Hz  
 AQ 0.5767168 sec  
 RG 36  
 DW 4.400 usec  
 DE 18.00 usec  
 TE 298.0 K  
 D1 1.00000000 sec  
 TDO 1  
 SF01 470.611172 MHz  
 NUC1 19F  
 P0 5.00 usec  
 F1 15.00 usec  
 PLW1 12.8149958 W

F2 - Processing parameters  
 SI 65536  
 SF 470.6582450 MHz  
 EQ  
 MDW 0  
 SSB 0  
 LB 0  
 GB 0  
 PC 1.00

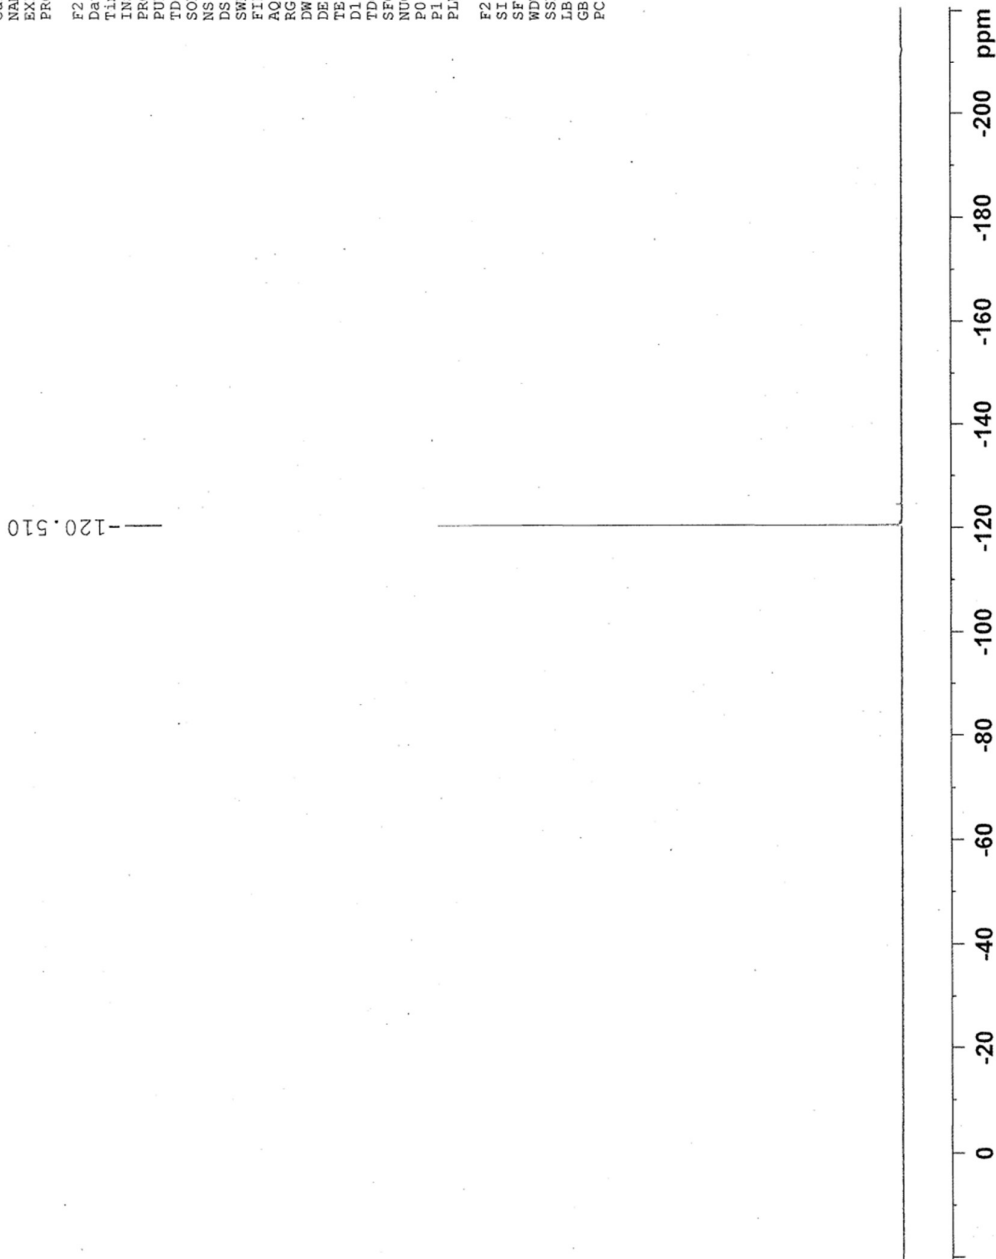

Figure S9. <sup>19</sup>F NMR spectrum of compound YC-H.



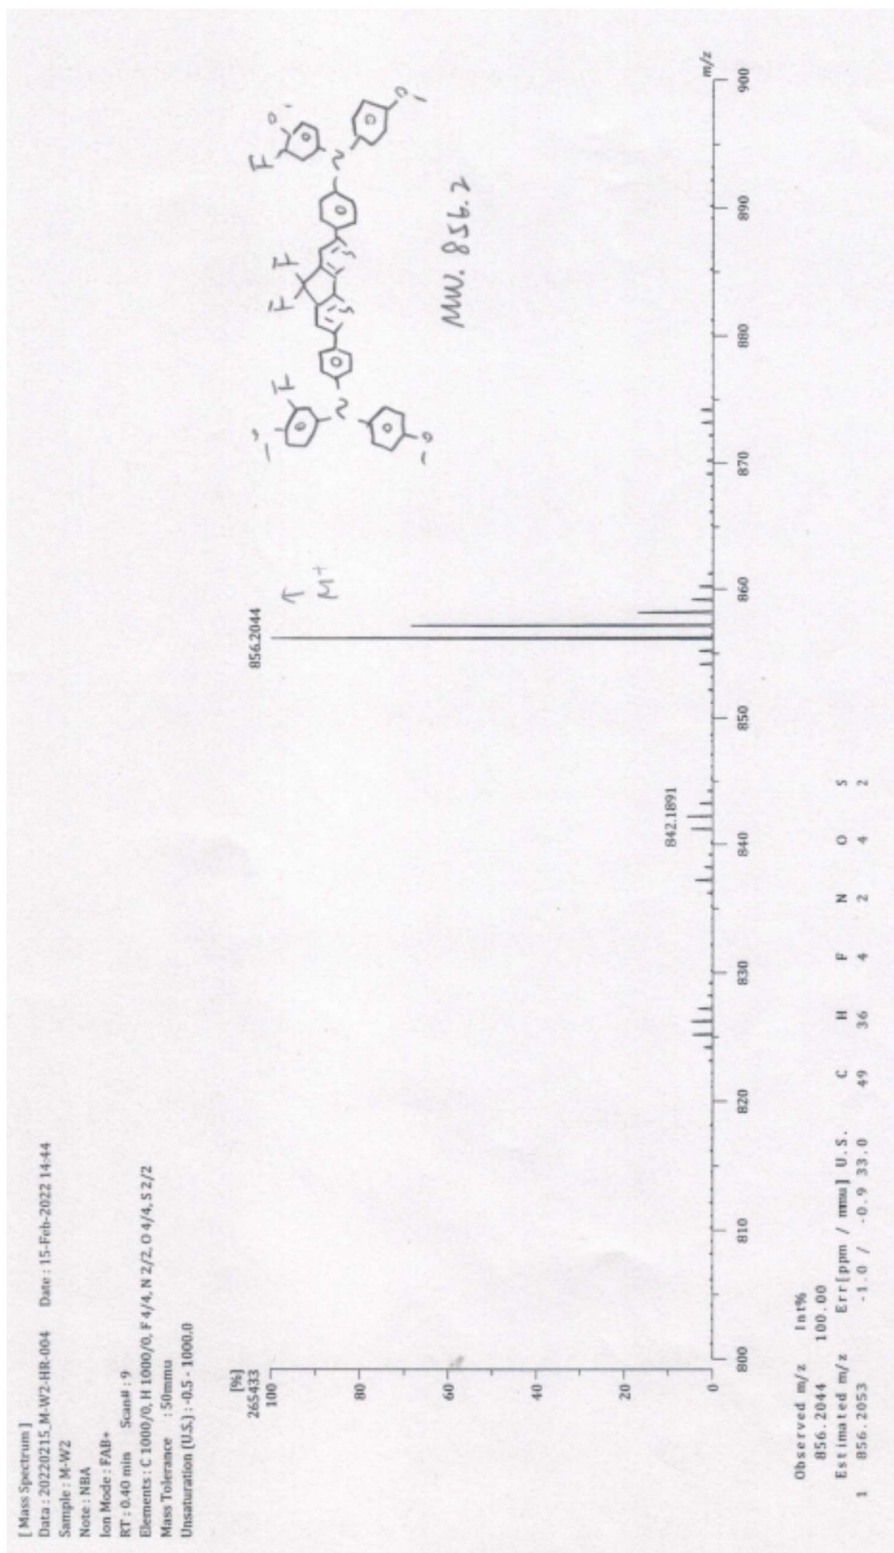

Figure S10. Mass spectra of YC-oF.

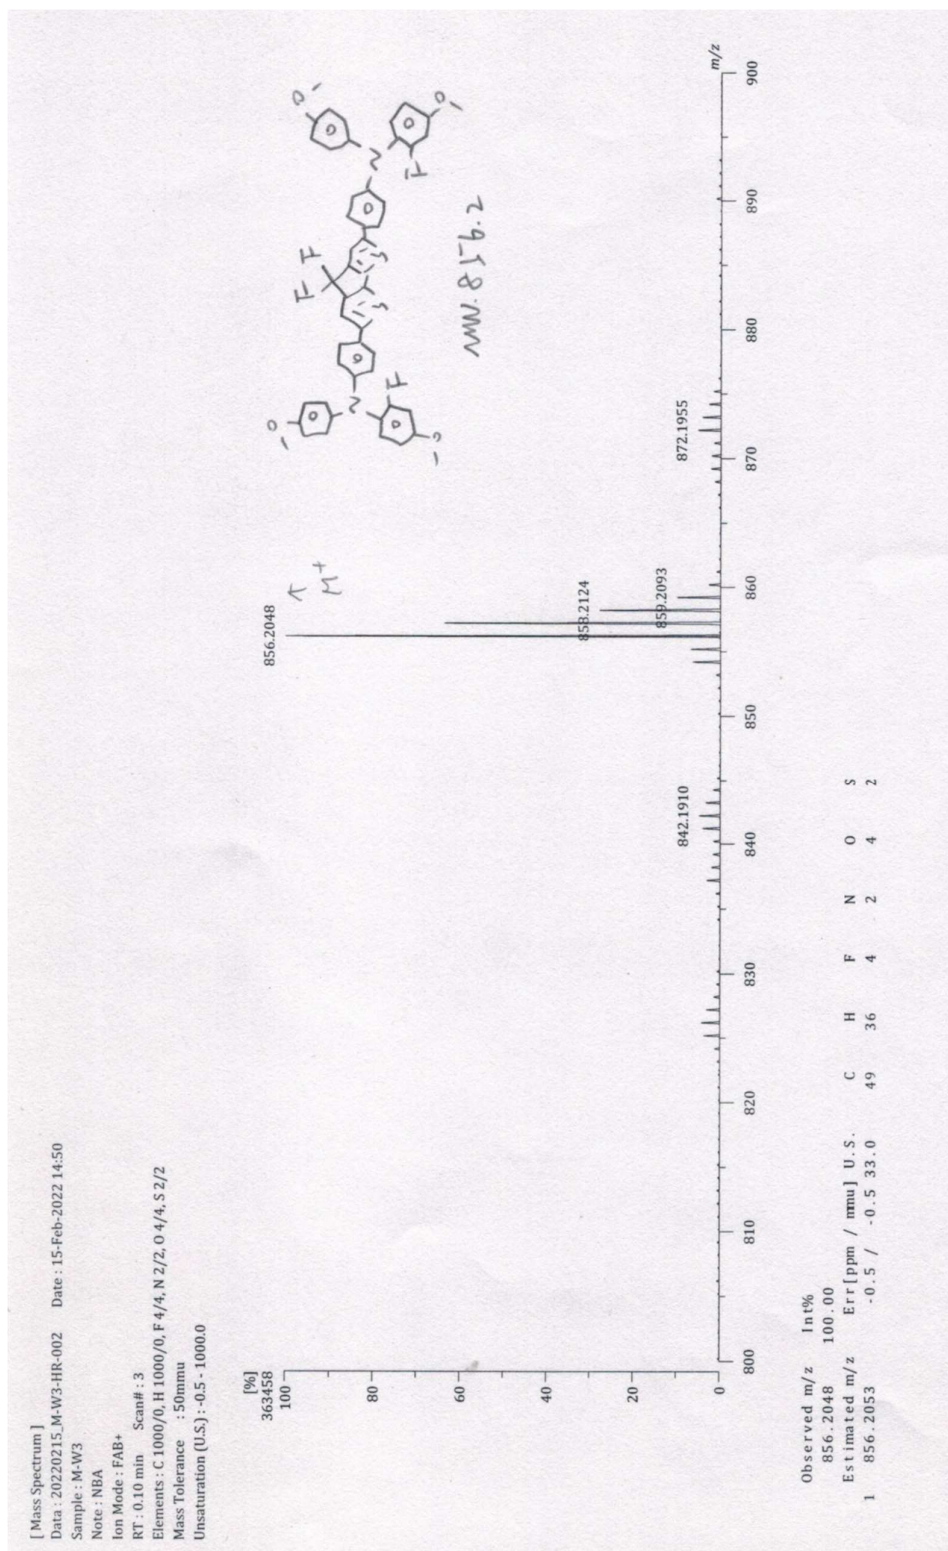

Figure S11. Mass spectra of YSH-mF.

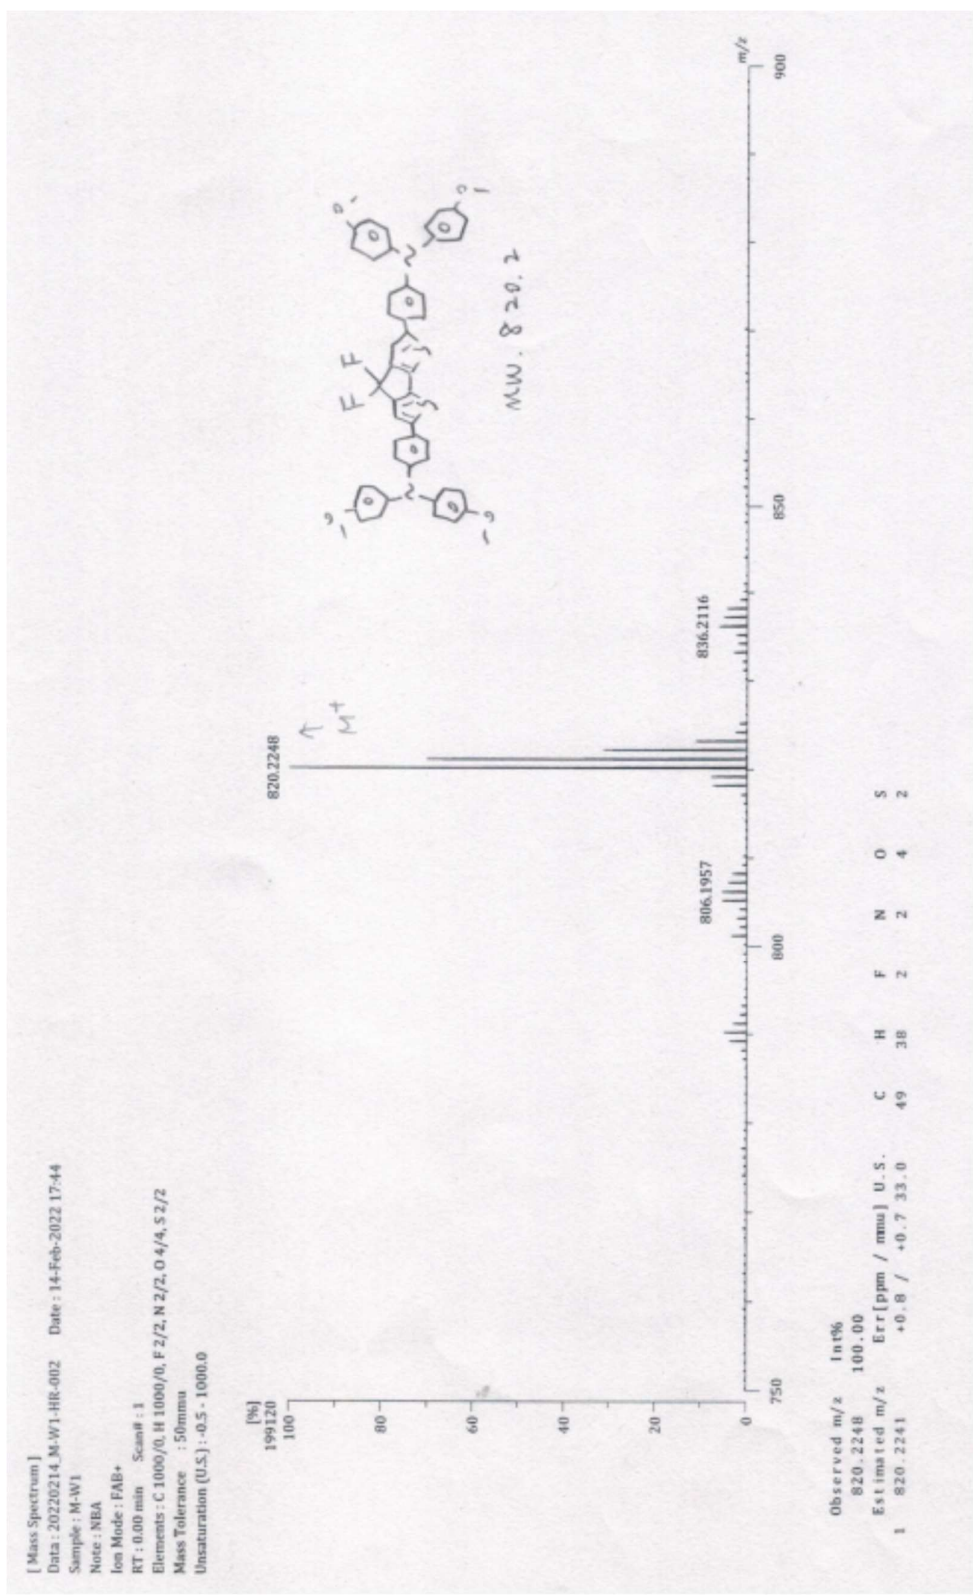

Figure S12. Mass spectra of YC-H.

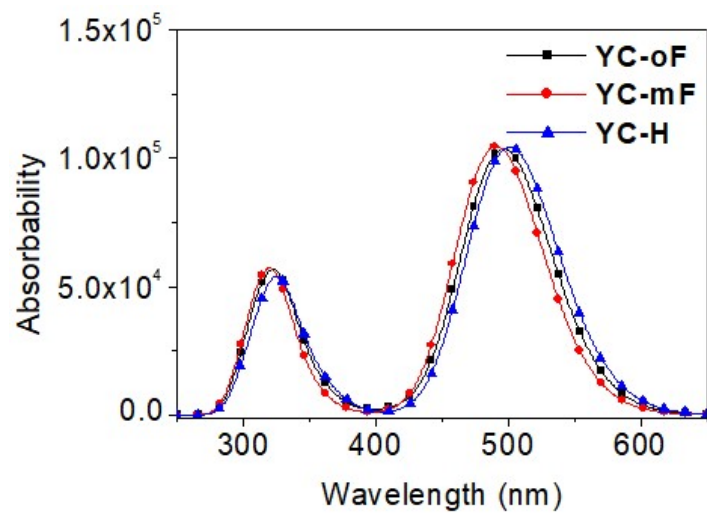

**Figure S13.** Calculated gas-phase absorption spectra of YC-oF, YC-mF, and YC-H.

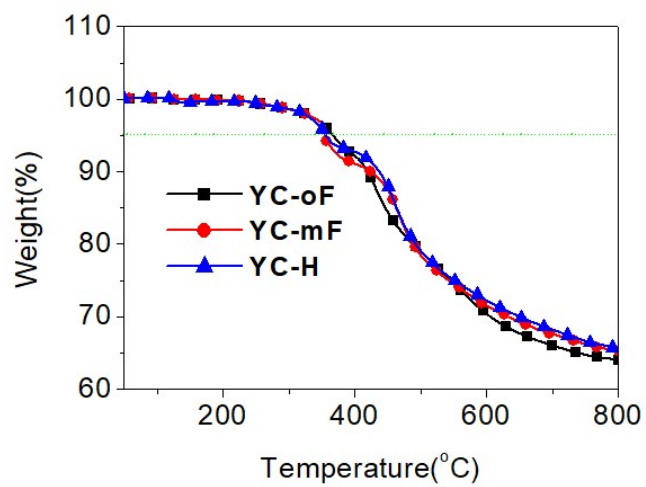

**Figure S14.** TGA curves of the YC series.

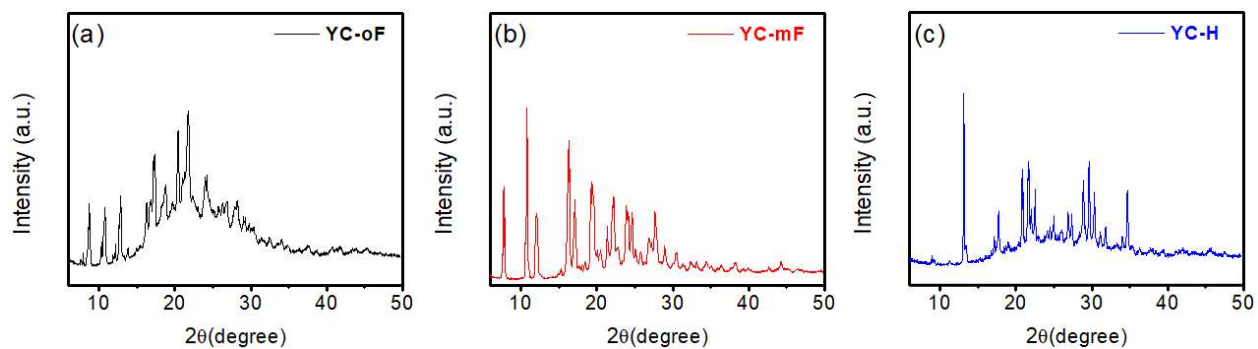

**Figure S15.** PXRD powder patterns of (a) YC-oF, (b) YC-mF, and (c) YC-H.

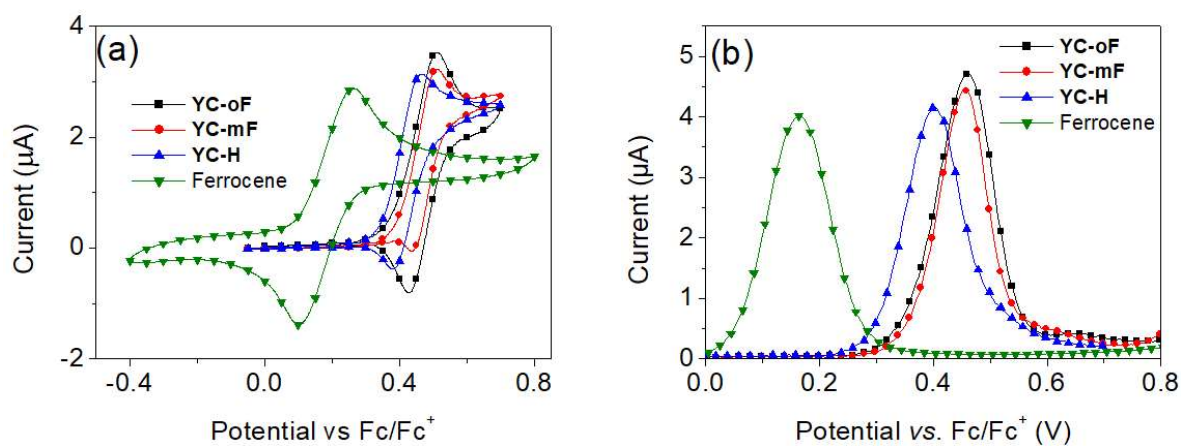

**Figure S16.** (a) Cyclic voltammetry (CV) and (b) differential pulsed voltammetry (DPV) of YC series and ferrocene in THF solution.

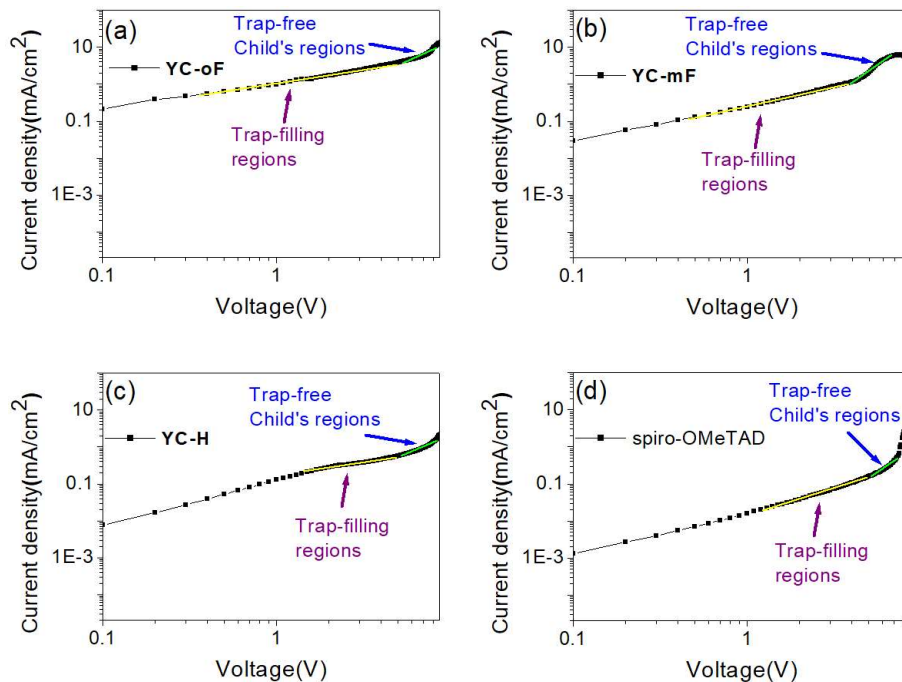

**Figure S17.** Space-charge-limited-current plots in the  $J$ - $V$  characteristics of the devices with YC-oF, YC-mF, YC-H and spiro-OMeTAD as HTM, respectively.

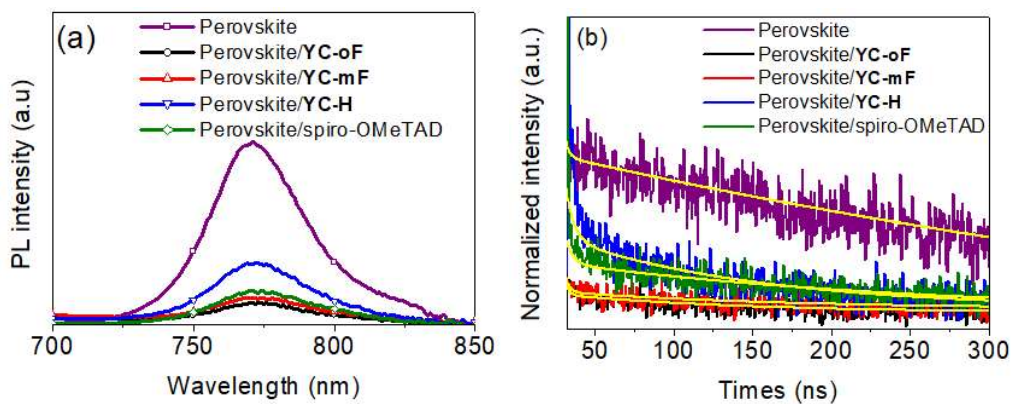

**Figure S18.** (a) Steady-state photoluminescence spectra and (b) Time-resolved photoluminescence (TRPL) spectra of pristine perovskite and perovskite with HTMs.

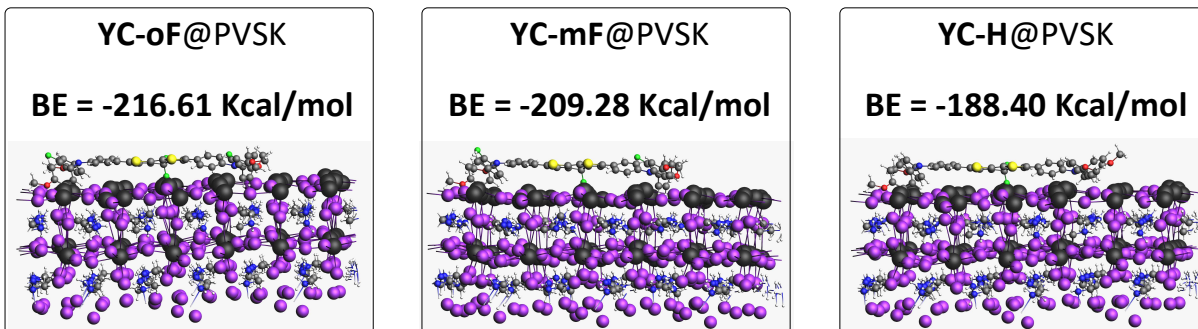

Figure S19. Binding energy of HTMs on the perovskite surface.

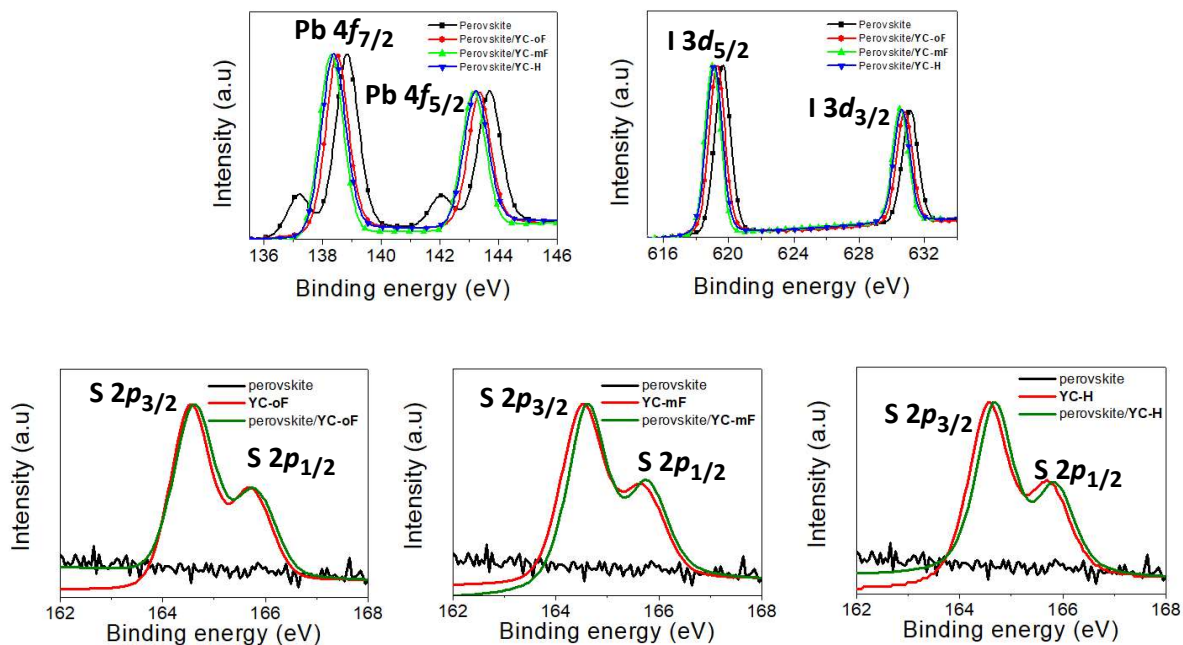

Figure S20. XPS signals of Pb 4f, I 3d, and S 2p from the pristine YC-oF, YC-mF and YC-H film and YC-oF, YC-mF and YC-H coated perovskite film.

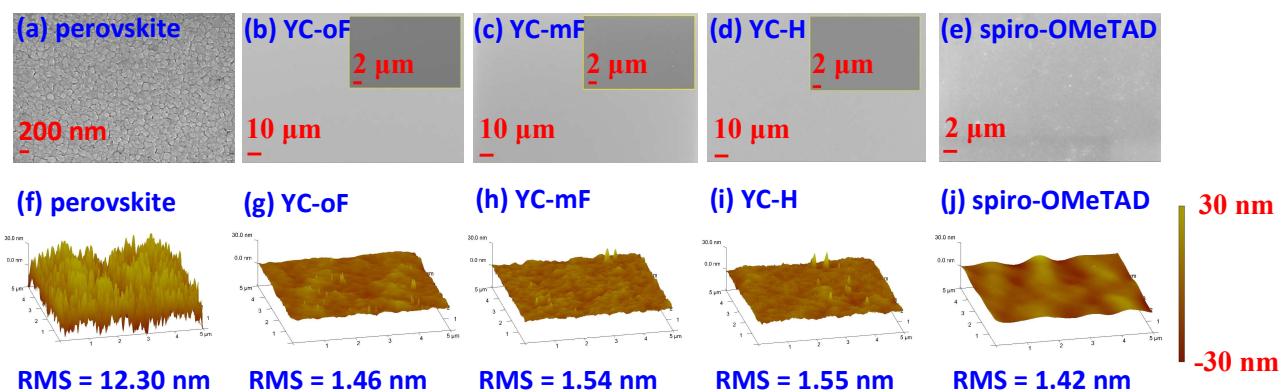

**Figure S21.** The top-view SEM images (a-e) and AFM three-dimensional surface plots (f-j) of perovskite film and perovskite/HTMs.

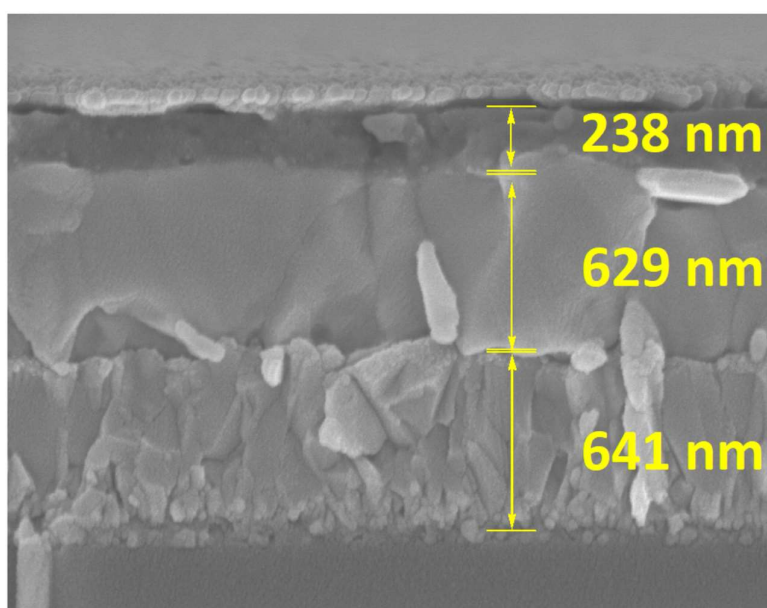

**Figure S22.** Cross-sectional SEM image of PSCs with the device structure of FTO/SnO<sub>2</sub>/perovskite/YC-oF/Ag.



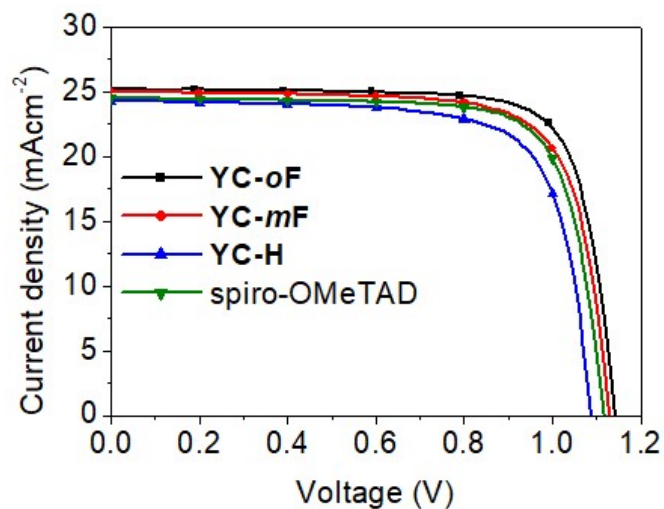

**Figure S23.** Plots of  $J$ - $V$  curves for the perovskite solar cells using **YC** series and spiro-OMeTAD as HTM under forward scan (at illumination of  $100 \text{ mW/cm}^2$ , AM1.5G).

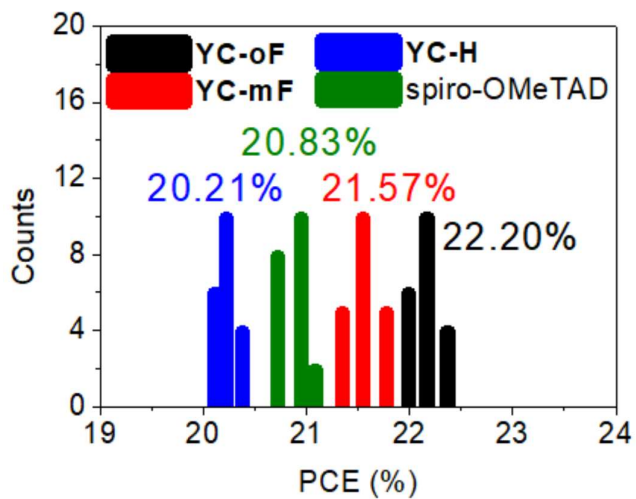

**Figure S24.** Histogram of PCEs from 20 individual PSCs based on **YC** series and spiro-OMeTAD.

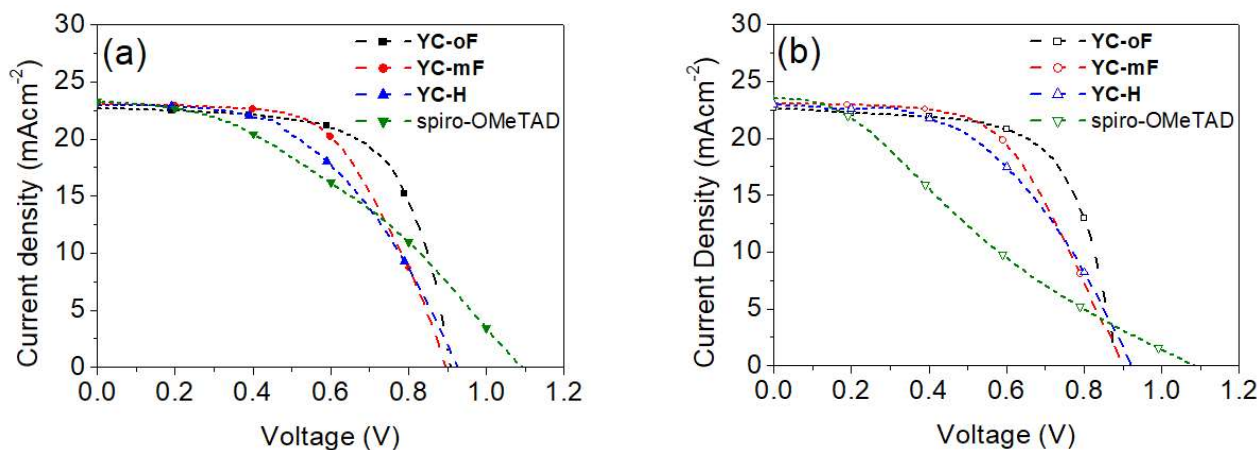

**Figure S25.** *J-V* curves of the PSCs with different dopant-free HTMs based on YC series and spiro-OMeTAD for (a) reverse scan and (b) forward scan.

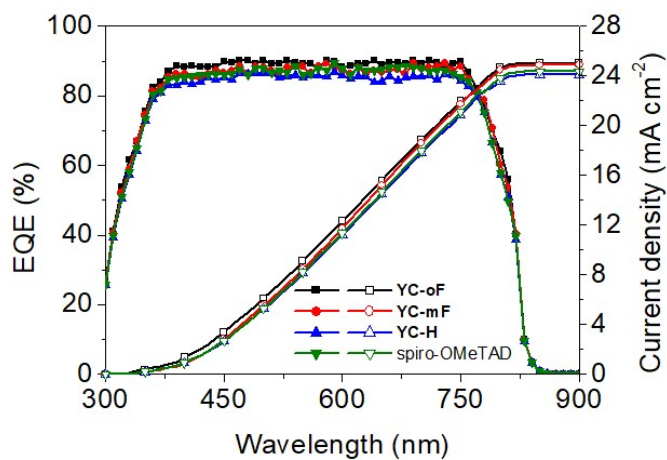

**Figure S26.** Corresponding IPCE spectra and integrated photocurrent for devices with YC series and spiro-OMeTAD.

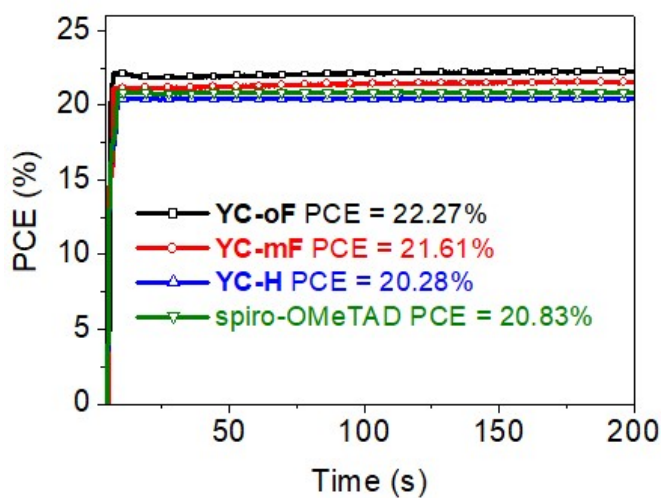

**Figure S27.** Stabilized power output of PSC devices for YC series and Spiro-OMeTAD at their maximum power point.

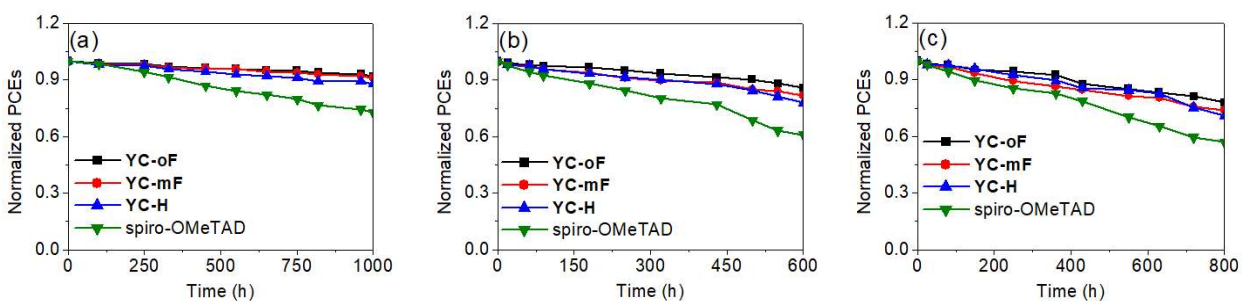

**Figure S28.** Normalized long-term device stability of YC-oF, YC-mF, YC-H and spiro-OMeTAD-based PSCs: (a) stored at 20-25 °C environment; (b) thermal stressed at 85 °C; and (c) continuous light soaking in glovebox at 40 °C.

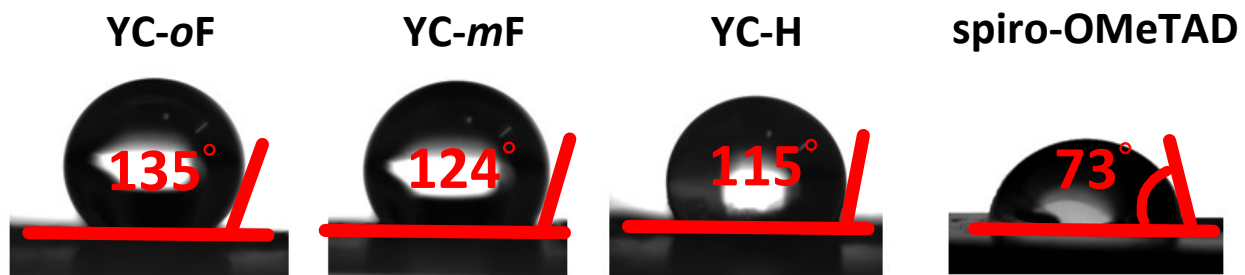

**Figure S29.** The water contact angles on YC-oF, YC-mF, YC-H and spiro-OMeTAD films.

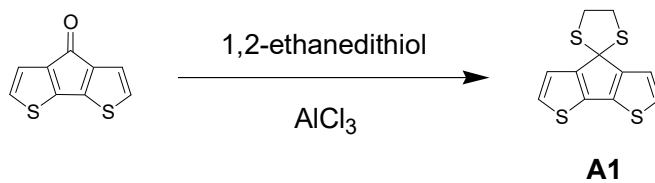

**Table S1** Cost Calculation of Compound **A1**

| Reagent                                     | Amount<br>(g) | Amount<br>(mL) | Price<br>(\$/g or<br>\$/mL) | Total Price<br>(\$) |
|---------------------------------------------|---------------|----------------|-----------------------------|---------------------|
| 4H-cyclopenta[2,1-b-3,4-b']dithiophen-4-one | 0.11          |                | 20                          | 2.2                 |
| 1,2-ethanedithiol                           | 0.082         |                | 0.97                        | 0.08                |
| AlCl <sub>3</sub>                           | 0.24          |                | 0.016                       | 0.003               |
| Dichloromethane                             |               | 200            | 0.0149                      | 2.98                |
| Water                                       |               | 150            | 0                           | 0                   |
| Hexane                                      |               | 700            | 0.0011                      | 0.77                |
| Silica gel                                  | 40            |                | 0.0042                      | 0.168               |
| Total Cost                                  | 6.201\$       |                |                             |                     |
| Total amount of compound <b>A1</b>          | 0.14 g        |                |                             |                     |
| Cost of compound <b>A1</b>                  | 44.29 \$/g    |                |                             |                     |

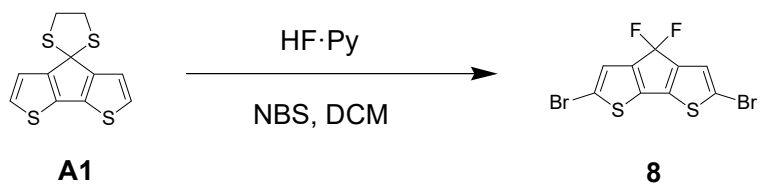

**Table S2** Cost Calculation of Compound **8**

| Reagent                           | Amount<br>(g) | Amount<br>(mL) | Price<br>(\$/g or<br>\$/mL) | Total Price<br>(\$) |
|-----------------------------------|---------------|----------------|-----------------------------|---------------------|
| <b>A1</b>                         | 0.105         |                | 44.29                       | 4.65                |
| NBS                               | 0.489         |                | 0.094                       | 0.046               |
| HF·Py                             |               | 1              | 1.4                         | 1.4                 |
| Dichloromethane                   |               | 4              | 0.0149                      | 0.0596              |
| Hexane                            |               | 100            | 0.0011                      | 0.11                |
| Silica gel                        | 20            |                | 0.0042                      | 0.084               |
| Total Cost                        | 6.34\$        |                |                             |                     |
| Total amount of compound <b>8</b> | 0.083 g       |                |                             |                     |
| Cost of compound <b>8</b>         | 76.39 \$/g    |                |                             |                     |

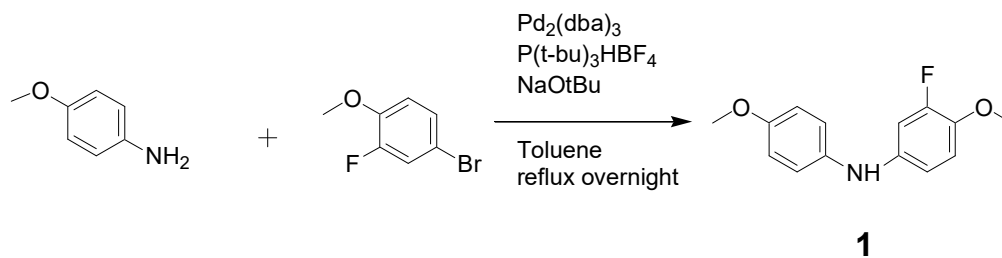

**Table S3** Cost Calculation of Compound **1**

| Reagent                               | Amount<br>(g) | Amount<br>(mL) | Price<br>(\$/g or<br>\$/mL) | Total Price<br>(\$) |
|---------------------------------------|---------------|----------------|-----------------------------|---------------------|
| <i>p</i> -anisidine                   | 6             |                | 0.26                        | 1.56                |
| 4-bromo-2-fluoro-1-methoxybenzene     | 10.494        |                | 13.33                       | 139.89              |
| Pd <sub>2</sub> (dba) <sub>3</sub>    | 0.446         |                | 26.16                       | 11.67               |
| P(t-bu) <sub>3</sub> HBF <sub>4</sub> | 0.424         |                | 36.33                       | 15.40               |
| sodium tert-butoxide                  | 9.36          |                | 0.48                        | 4.49                |
| Toluene                               |               | 80             | 0.004                       | 0.32                |
| Dichloromethane                       |               | 600            | 0.0149                      | 8.94                |
| Water                                 |               | 150            | 0                           | 0                   |
| Hexane                                |               | 1400           | 0.0011                      | 1.54                |
| Silica gel                            | 80            |                | 0.0042                      | 0.336               |
| Total Cost                            | 184.146\$     |                |                             |                     |
| Total amount of compound <b>1</b>     | 10.4 g        |                |                             |                     |
| Cost of compound <b>1</b>             | 17.706 \$/g   |                |                             |                     |

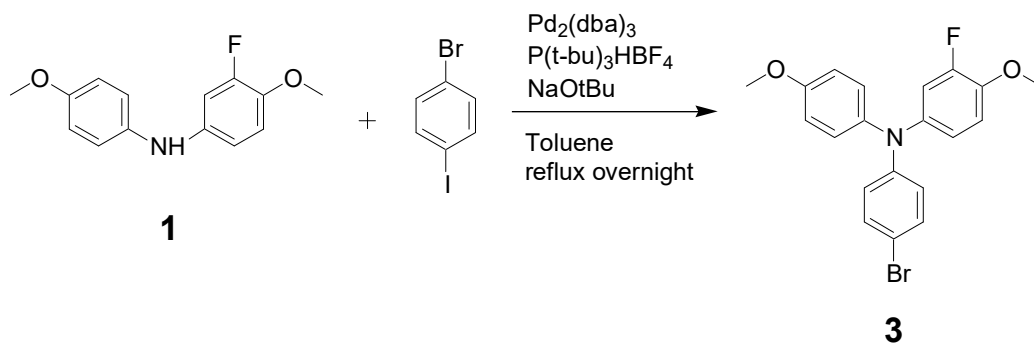

**Table S4** Cost Calculation of Compound **3**

| Reagent                           | Amount<br>(g) | Amount<br>(mL) | Price<br>(\$/g or<br>\$/mL) | Total Price<br>(\$) |
|-----------------------------------|---------------|----------------|-----------------------------|---------------------|
| <b>1</b>                          | 6             |                | 17.706                      | 106.236             |
| 1-Bromo-4-iodobenzene             | 13.72         |                | 8.133                       | 111.598             |
| $\text{Pd}_2(\text{dba})_3$       | 0.448         |                | 26.16                       | 11.72               |
| DPPF                              | 0.544         |                | 26.666                      | 14.507              |
| sodium tert-butoxide              | 4.663         |                | 0.48                        | 2.24                |
| Toluene                           |               | 50             | 0.004                       | 0.2                 |
| Dichloromethane                   |               | 400            | 0.0149                      | 5.96                |
| Water                             |               | 150            | 0                           | 0                   |
| Hexane                            |               | 1200           | 0.0011                      | 1.32                |
| Silica gel                        | 80            |                | 0.0042                      | 0.336               |
| Total Cost                        | 254.117\$     |                |                             |                     |
| Total amount of compound <b>3</b> | 8.30 g        |                |                             |                     |
| Cost of compound <b>3</b>         | 30.62 \$/g    |                |                             |                     |



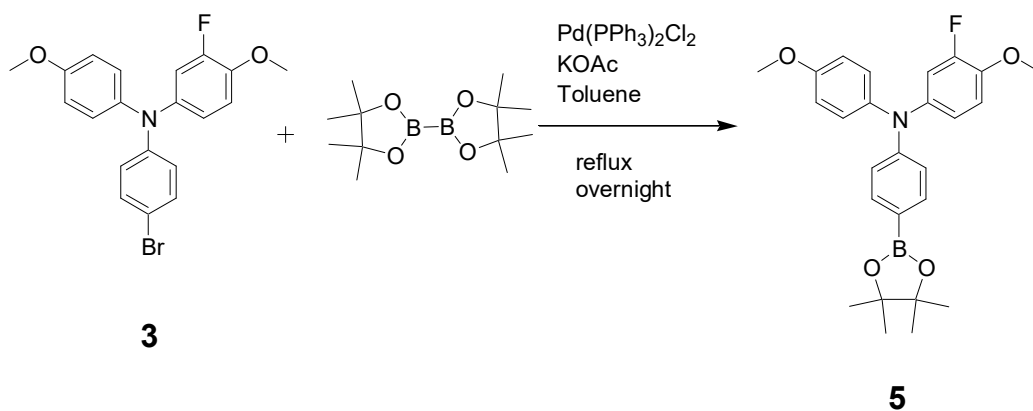

**Table S5** Cost Calculation of Compound **5**

| Reagent                                            | Amount<br>(g) | Amount<br>(mL) | Price<br>(\$/g or<br>\$/mL) | Total Price<br>(\$) |
|----------------------------------------------------|---------------|----------------|-----------------------------|---------------------|
| <b>3</b>                                           | 5             |                | 30.62                       | 153.1               |
| Pd(PPh <sub>3</sub> ) <sub>2</sub> Cl <sub>2</sub> | 0.51          |                | 10.71                       | 5.46                |
| Bis(pinacolato)diboron                             | 3.768         |                | 0.36                        | 1.356               |
| KOAc                                               | 3.85          |                | 0.04                        | 0.154               |
| Toluene                                            |               | 125            | 0.004                       | 0.5                 |
| Dichloromethane                                    |               | 800            | 0.0149                      | 11.92               |
| Water                                              |               | 200            | 0                           | 0                   |
| Hexane                                             |               | 800            | 0.0011                      | 0.88                |
| Silica gel                                         | 80            |                | 0.0042                      | 0.336               |
| Total Cost                                         |               |                | 173.706\$                   |                     |
| Total amount of compound <b>5</b>                  |               |                | 4.75 g                      |                     |
| Cost of compound <b>5</b>                          |               |                | 36.57 \$/g                  |                     |

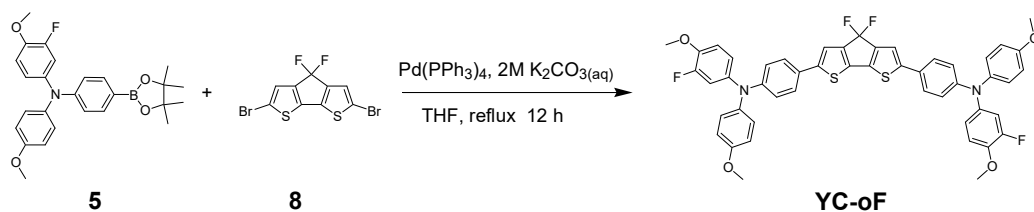

**Table S6** Cost Calculation of Compound **YC-oF**

| Reagent                            | Amount<br>(g) | Amount<br>(mL) | Price<br>(\$/g or<br>\$/mL) | Total Price<br>(\$) |
|------------------------------------|---------------|----------------|-----------------------------|---------------------|
| <b>8</b>                           | 0.187         |                | 76.39                       | 14.28               |
| <b>5</b>                           | 0.5           |                | 36.57                       | 18.285              |
| Pd(PPh <sub>3</sub> ) <sub>4</sub> | 0.036         |                | 22.24                       | 0.80                |
| K <sub>2</sub> CO <sub>3</sub>     | 0.355         |                | 0.03                        | 0.011               |
| Water                              |               | 50             | 0.00                        | 0.00                |
| THF                                |               | 3              | 0.034                       | 0.102               |
| MgSO <sub>4</sub>                  | 1             |                | 0.06                        | 0.06                |
| Hexane                             |               | 50             | 0.0011                      | 0.055               |
| Dichloromethane                    |               | 150            | 0.0149                      | 2.235               |
| Silica gel                         | 20            |                | 0.0042                      | 0.084               |
| Total Cost                         |               |                | 35.912\$                    |                     |
| Total amount of <b>YC-oF</b>       |               |                | 0.325 g                     |                     |
| Cost of <b>YC-oF</b>               |               |                | 110.50 \$/g                 |                     |

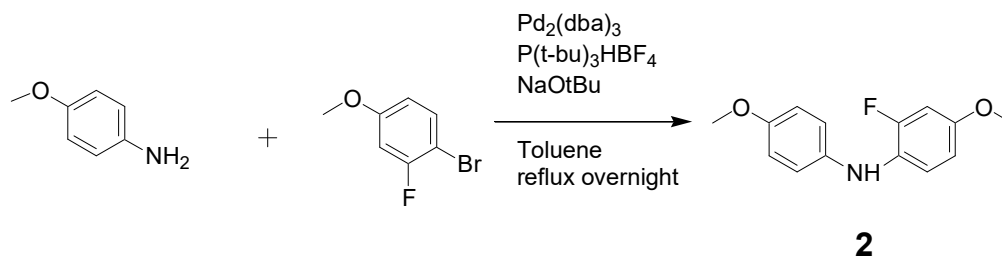

**Table S7** Cost Calculation of Compound **2**

| Reagent                               | Amount<br>(g) | Amount<br>(mL) | Price<br>(\$/g or<br>\$/mL) | Total Price<br>(\$) |
|---------------------------------------|---------------|----------------|-----------------------------|---------------------|
| <i>p</i> -anisidine                   | 6             |                | 0.26                        | 1.56                |
| 4-bromo-3-fluoro-1-methoxybenzene     | 10.56         |                | 4.133                       | 43.64               |
| $\text{Pd}_2(\text{dba})_3$           | 0.446         |                | 26.16                       | 11.67               |
| $\text{P}(\text{t-bu})_3\text{HBF}_4$ | 0.424         |                | 36.33                       | 15.40               |
| sodium tert-butoxide                  | 9.36          |                | 0.48                        | 4.49                |
| Toluene                               |               | 80             | 0.004                       | 0.32                |
| Dichloromethane                       |               | 600            | 0.0149                      | 8.94                |
| Water                                 |               | 150            | 0                           | 0                   |
| Hexane                                |               | 1400           | 0.0011                      | 1.54                |
| Silica gel                            | 80            |                | 0.0042                      | 0.336               |
| Total Cost                            |               |                |                             | 87.896\$            |
| Total amount of compound <b>2</b>     |               |                |                             | 9.8 g               |
| Cost of compound <b>2</b>             |               |                |                             | 8.969 \$/g          |

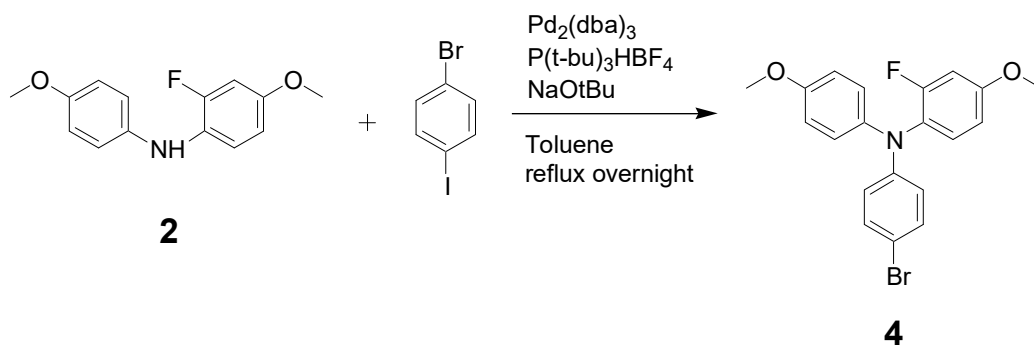

**Table S8** Cost Calculation of Compound **4**

| Reagent                           | Amount<br>(g) | Amount<br>(mL) | Price<br>(\$/g or<br>\$/mL) | Total Price<br>(\$) |
|-----------------------------------|---------------|----------------|-----------------------------|---------------------|
| <b>2</b>                          | 6             |                | 8.969                       | 53.814              |
| 1-Bromo-4-iodobenzene             | 13.72         |                | 8.133                       | 111.598             |
| $\text{Pd}_2(\text{dba})_3$       | 0.448         |                | 26.16                       | 11.72               |
| DPPF                              | 0.544         |                | 26.666                      | 14.507              |
| sodium tert-butoxide              | 4.663         |                | 0.48                        | 2.24                |
| Toluene                           |               | 50             | 0.004                       | 0.2                 |
| Dichloromethane                   |               | 400            | 0.0149                      | 5.96                |
| Water                             |               | 150            | 0                           | 0                   |
| Hexane                            |               | 1200           | 0.0011                      | 1.32                |
| Silica gel                        | 80            |                | 0.0042                      | 0.336               |
| Total Cost                        | 201.695\$     |                |                             |                     |
| Total amount of compound <b>4</b> | 8.20 g        |                |                             |                     |
| Cost of compound <b>4</b>         | 24.60 \$/g    |                |                             |                     |

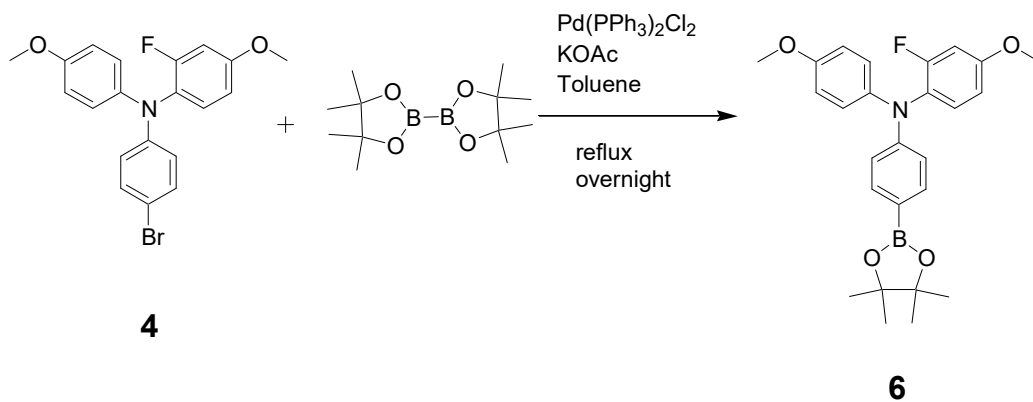

**Table S9** Cost Calculation of Compound **6**

| Reagent                           | Amount<br>(g) | Amount<br>(mL) | Price<br>(\$/g or<br>\$/mL) | Total Price<br>(\$) |
|-----------------------------------|---------------|----------------|-----------------------------|---------------------|
| <b>4</b>                          | 5             |                | 24.60                       | 122.98              |
| $\text{Pd(PPh}_3)_2\text{Cl}_2$   | 0.51          |                | 10.71                       | 5.46                |
| Bis(pinacolato)diboron            | 3.768         |                | 0.36                        | 1.356               |
| KOAc                              | 3.85          |                | 0.04                        | 0.154               |
| Toluene                           |               | 125            | 0.004                       | 0.5                 |
| Dichloromethane                   |               | 800            | 0.0149                      | 11.92               |
| Water                             |               | 200            | 0                           | 0                   |
| Hexane                            |               | 800            | 0.0011                      | 0.88                |
| Silica gel                        | 80            |                | 0.0042                      | 0.336               |
| Total Cost                        |               |                | 143.59\$                    |                     |
| Total amount of compound <b>6</b> |               |                | 4.08 g                      |                     |
| Cost of compound <b>6</b>         |               |                | 35.19 \$/g                  |                     |

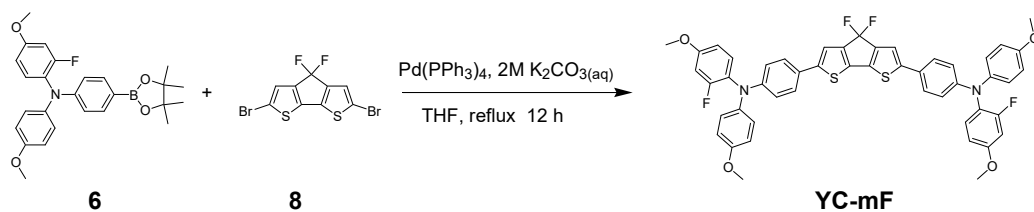

**Table S10** Cost Calculation of Compound **YC-mF**

| Reagent                      | Amount<br>(g) | Amount<br>(mL) | Price<br>(\$/g or<br>\$/mL) | Total Price<br>(\$) |
|------------------------------|---------------|----------------|-----------------------------|---------------------|
| <b>8</b>                     | 0.187         |                | 76.39                       | 14.28               |
| <b>6</b>                     | 0.5           |                | 35.19                       | 17.595              |
| $\text{Pd(PPh}_3)_4$         | 0.036         |                | 22.24                       | 0.80                |
| $\text{K}_2\text{CO}_3$      | 0.355         |                | 0.03                        | 0.011               |
| Water                        |               | 50             | 0.00                        | 0.00                |
| THF                          |               | 3              | 0.034                       | 0.102               |
| $\text{MgSO}_4$              | 1             |                | 0.06                        | 0.06                |
| Hexane                       |               | 50             | 0.0011                      | 0.055               |
| Dichloromethane              |               | 150            | 0.0149                      | 2.235               |
| Silica gel                   | 20            |                | 0.0042                      | 0.084               |
| Total Cost                   |               |                | 35.222\$                    |                     |
| Total amount of <b>YC-mF</b> |               |                | 0.317 g                     |                     |
| Cost of <b>YC-mF</b>         |               |                | 111.10 \$/g                 |                     |

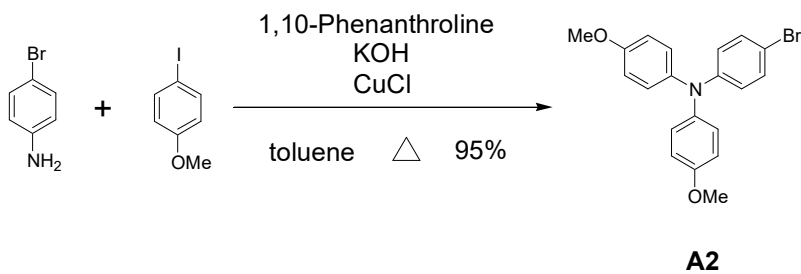

**Table S11** Cost Calculation of Compound **A2**

| Reagent                            | Amount<br>(g) | Amount<br>(mL) | Price<br>(\$/g or<br>\$/mL) | Total Price<br>(\$) |
|------------------------------------|---------------|----------------|-----------------------------|---------------------|
| 4-Iodoanisole                      | 2.01          |                | 0.18                        | 0.362               |
| 4-Bromoaniline                     | 0.49          |                | 0.12                        | 0.0588              |
| CuCl                               | 0.01          |                | 0.06                        | 0.0006              |
| KOH                                | 1.29          |                | 0.02                        | 0.026               |
| 1,10-Phenanthroline                | 0.02          |                | 1.04                        | 0.021               |
| Toluene                            |               | 15             | 0.004                       | 0.06                |
| Dichloromethane                    |               | 300            | 0.0149                      | 4.47                |
| Water                              |               | 150            | 0                           | 0                   |
| Hexane                             |               | 700            | 0.0011                      | 0.77                |
| Silica gel                         | 50            |                | 0.0042                      | 0.21                |
| Total Cost                         |               |                | 5.978\$                     |                     |
| Total amount of compound <b>A2</b> |               |                | 1.04 g                      |                     |
| Cost of compound <b>A2</b>         |               |                | 5.748 \$/g                  |                     |

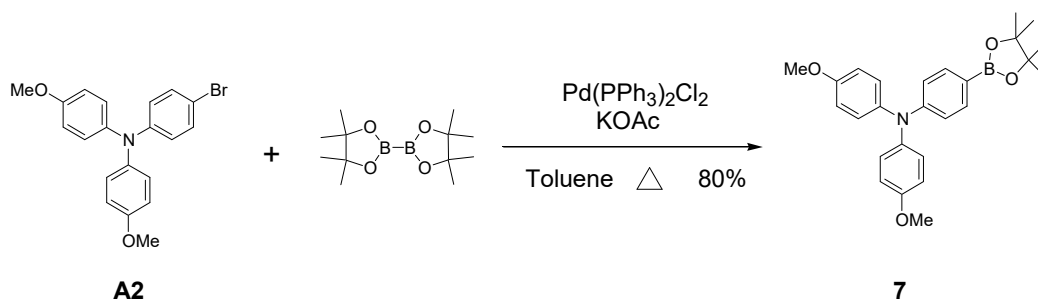

**Table S12** Cost Calculation of Compound **7**

| Reagent                                            | Amount<br>(g) | Amount<br>(mL) | Price<br>(\$/g or<br>\$/mL) | Total Price<br>(\$) |
|----------------------------------------------------|---------------|----------------|-----------------------------|---------------------|
| <b>A2</b>                                          | 1.08          |                | 5.748                       | 6.66                |
| Pd(PPh <sub>3</sub> ) <sub>2</sub> Cl <sub>2</sub> | 0.06          |                | 10.71                       | 0.643               |
| Bis(pinacolato)diboron                             | 0.86          |                | 0.36                        | 0.31                |
| KOAc                                               | 0.85          |                | 0.04                        | 0.81                |
| Toluene                                            |               | 20             | 0.004                       | 0.08                |
| Dichloromethane                                    |               | 150            | 0.0149                      | 2.235               |
| Water                                              |               | 200            | 0                           | 0                   |
| Hexane                                             |               | 200            | 0.0011                      | 0.22                |
| Silica gel                                         | 40            |                | 0.0042                      | 0.168               |
| Total Cost                                         | 11.126\$      |                |                             |                     |
| Total amount of compound <b>7</b>                  | 0.97 g        |                |                             |                     |
| Cost of compound <b>7</b>                          | 11.47 \$/g    |                |                             |                     |



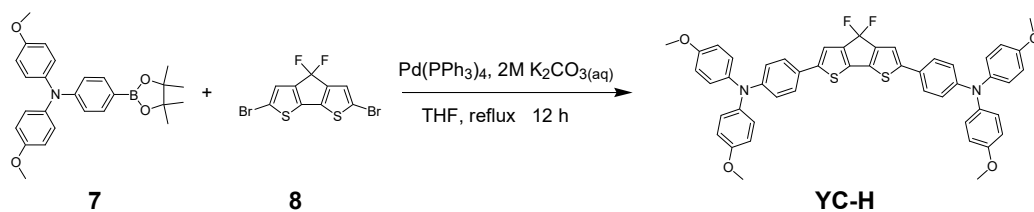

**Table S13** Cost Calculation of Compound **YC-H**

| Reagent                            | Amount<br>(g) | Amount<br>(mL) | Price<br>(\$/g or<br>\$/mL) | Total Price<br>(\$) |
|------------------------------------|---------------|----------------|-----------------------------|---------------------|
| <b>8</b>                           | 0.218         |                | 76.39                       | 16.65               |
| <b>7</b>                           | 0.5           |                | 11.47                       | 5.735               |
| Pd(PPh <sub>3</sub> ) <sub>4</sub> | 0.027         |                | 22.24                       | 0.60                |
| K <sub>2</sub> CO <sub>3</sub>     | 0.355         |                | 0.03                        | 0.011               |
| Water                              |               | 50             | 0.00                        | 0.00                |
| THF                                |               | 4              | 0.034                       | 0.136               |
| MgSO <sub>4</sub>                  | 1             |                | 0.06                        | 0.06                |
| Hexane                             |               | 50             | 0.0011                      | 0.055               |
| Dichloromethane                    |               | 150            | 0.0149                      | 2.235               |
| Silica gel                         | 20            |                | 0.0042                      | 0.084               |
| Total Cost                         |               |                | 25.566\$                    |                     |
| Total amount of <b>YC-H</b>        |               |                | 0.338 g                     |                     |
| Cost of <b>YC-H</b>                |               |                | 75.64 \$/g                  |                     |

**Table S14** Calculated TDDFT excitation energies ( $E$ ), oscillator strengths ( $f$ ), MO compositions and characters for **YC-oF**.

| HTM          | n | E(eV, nm) | f      | Composition         | Character               |
|--------------|---|-----------|--------|---------------------|-------------------------|
| <b>YC-oF</b> | 1 | 2.4963    | 1.5353 | 100% HOMO → LUMO    | CT                      |
|              | 2 | 2.9417    | 0.0318 | 100% HOMO-1 → LUMO  | $\pi \rightarrow \pi^*$ |
|              | 3 | 3.4629    | 0.1001 | 100% HOMO-2 → LUMO  | $\pi \rightarrow \pi^*$ |
|              | 4 | 3.6161    | 0.0275 | 15% HOMO-1 → LUMO+3 | $\pi \rightarrow \pi^*$ |
|              |   |           |        | 15% HOMO → LUMO+1   | $\pi \rightarrow \pi^*$ |
|              |   |           |        | 6% HOMO → LUMO+2    | $\pi \rightarrow \pi^*$ |
|              |   |           |        | 64% HOMO → LUMO+3   | $\pi \rightarrow \pi^*$ |
|              | 5 | 3.6307    | 0.0226 | 3% HOMO-1 → LUMO+2  | $\pi \rightarrow \pi^*$ |
|              |   |           |        | 3% HOMO-1 → LUMO+4  | $\pi \rightarrow \pi^*$ |
|              |   |           |        | 73% HOMO → LUMO+1   | $\pi \rightarrow \pi^*$ |
|              |   |           |        | 3% HOMO → LUMO+2    | $\pi \rightarrow \pi^*$ |
|              |   |           |        | 18% HOMO → LUMO+3   | $\pi \rightarrow \pi^*$ |
|              | 6 | 3.6595    | 0.0117 | 26% HOMO-1 → LUMO+2 | $\pi \rightarrow \pi^*$ |
|              |   |           |        | 10% HOMO → LUMO+1   | $\pi \rightarrow \pi^*$ |
|              |   |           |        | 64% HOMO → LUMO+2   | $\pi \rightarrow \pi^*$ |

**Table S15** Calculated TDDFT excitation energies ( $E$ ), oscillator strengths ( $f$ ), MO compositions and characters for **YC-mF**.

| HTM          | n | E(eV, nm) | f      | Composition         | Character               |
|--------------|---|-----------|--------|---------------------|-------------------------|
| <b>YC-mF</b> | 1 | 2.5248    | 1.5506 | 100% HOMO → LUMO    | CT                      |
|              | 2 | 3.0045    | 0.0107 | 100% HOMO-1 → LUMO  | $\pi \rightarrow \pi^*$ |
|              | 3 | 3.5194    | 0.0691 | 100% HOMO-2 → LUMO  | $\pi \rightarrow \pi^*$ |
|              | 4 | 3.5812    | 0.0299 | 4% HOMO-1 → LUMO+1  | $\pi \rightarrow \pi^*$ |
|              |   |           |        | 16% HOMO → LUMO+2   | $\pi \rightarrow \pi^*$ |
|              |   |           |        | 23% HOMO → LUMO+1   | $\pi \rightarrow \pi^*$ |
|              |   |           |        | 57% HOMO → LUMO+2   | $\pi \rightarrow \pi^*$ |
|              | 5 | 3.6225    | 0.0106 | 19% HOMO-1 → LUMO+3 | $\pi \rightarrow \pi^*$ |
|              |   |           |        | 10% HOMO → LUMO+1   | $\pi \rightarrow \pi^*$ |
|              |   |           |        | 10% HOMO → LUMO+2   | $\pi \rightarrow \pi^*$ |
|              |   |           |        | 61% HOMO → LUMO+3   | $\pi \rightarrow \pi^*$ |
|              | 6 | 3.7121    | 0.0274 | 3% HOMO-1 → LUMO+4  | $\pi \rightarrow \pi^*$ |
|              |   |           |        | 62% HOMO → LUMO+1   | $\pi \rightarrow \pi^*$ |
|              |   |           |        | 16% HOMO → LUMO+2   | $\pi \rightarrow \pi^*$ |
|              |   |           |        | 19% HOMO → LUMO+3   | $\pi \rightarrow \pi^*$ |

**Table S16** Calculated TDDFT excitation energies ( $E$ ), oscillator strengths ( $f$ ), MO compositions and characters for **YC-H**.

| HTM         | n | E(eV, nm) | f      | Composition                     | Character               |
|-------------|---|-----------|--------|---------------------------------|-------------------------|
| <b>YC-H</b> | 1 | 2.4733    | 1.5461 | 100% HOMO $\rightarrow$ LUMO    | CT                      |
|             | 2 | 2.9102    | 0.0112 | 100% HOMO-1 $\rightarrow$ LUMO  | $\pi \rightarrow \pi^*$ |
|             | 3 | 3.4549    | 0.1124 | 100% HOMO-2 $\rightarrow$ LUMO  | $\pi \rightarrow \pi^*$ |
|             | 4 | 3.5435    | 0.0352 | 8% HOMO-1 $\rightarrow$ LUMO+2  | $\pi \rightarrow \pi^*$ |
|             |   |           |        | 14% HOMO-1 $\rightarrow$ LUMO+3 | $\pi \rightarrow \pi^*$ |
|             |   |           |        | 64% HOMO $\rightarrow$ LUMO+2   | $\pi \rightarrow \pi^*$ |
|             |   |           |        | 14% HOMO $\rightarrow$ LUMO+3   | $\pi \rightarrow \pi^*$ |
|             | 5 | 3.559     | 0.0082 | 16% HOMO-1 $\rightarrow$ LUMO+2 | $\pi \rightarrow \pi^*$ |
|             |   |           |        | 8% HOMO-1 $\rightarrow$ LUMO+3  | $\pi \rightarrow \pi^*$ |
|             |   |           |        | 14% HOMO $\rightarrow$ LUMO+2   | $\pi \rightarrow \pi^*$ |
|             |   |           |        | 62% HOMO $\rightarrow$ LUMO+3   | $\pi \rightarrow \pi^*$ |
|             | 6 | 3.6394    | 0.0329 | 3% HOMO-1 $\rightarrow$ LUMO+4  | $\pi \rightarrow \pi^*$ |
|             |   |           |        | 97% HOMO $\rightarrow$ LUMO+1   | $\pi \rightarrow \pi^*$ |

**Table S17.** Summary of the fitting results and corresponding dynamic parameters derived from TRPL decay traces.

| HTM                 | A <sub>1</sub> (%) | $\tau_1$ (ns) | A <sub>2</sub> (%) | $\tau_2$ (ns) | $\tau_{avg.}$ (ns) |
|---------------------|--------------------|---------------|--------------------|---------------|--------------------|
| Pristine perovskite | 85                 | 2.26          | 15                 | 647.30        | 104.89             |
| <b>YC-oF</b>        | 93                 | 1.94          | 7                  | 114.97        | 9.91               |
| <b>YC-mF</b>        | 88                 | 2.1           | 12                 | 117.10        | 15.89              |
| <b>YC-H</b>         | 83                 | 2.33          | 17                 | 197.3         | 35.47              |
| Spiro-OMeTAD        | 74                 | 4.72          | 26                 | 115.44        | 33.51              |

**Table S18** Summary of photovoltaic characteristics extracted from *J-V* curves of perovskite solar cells without dopant under different scan direction

| HTM          | scan direction | $V_{oc}/V$ | $J_{sc}/mA\ cm^{-2}$ | FF (%) | PCE(%) |
|--------------|----------------|------------|----------------------|--------|--------|
| YC-oF        | reverse        | 0.907      | 22.69                | 65.61  | 13.48  |
|              | forward        | 0.884      | 22.64                | 66.05  | 13.20  |
| YC-mF        | reverse        | 0.896      | 23.11                | 58.66  | 12.12  |
|              | forward        | 0.897      | 23.08                | 56.44  | 11.67  |
| YC-H         | reverse        | 0.927      | 22.96                | 50.03  | 10.63  |
|              | forward        | 0.921      | 22.95                | 49.68  | 10.49  |
| spiro-OMeTAD | reverse        | 1.09       | 23.27                | 38.43  | 9.75   |
|              | forward        | 1.09       | 23.52                | 24.54  | 6.29   |

**Table S19** Photophysical and electrochemical data of YC-oF, YC-mF, and YC-H

| HTM   | $\lambda_{abs}$ (nm)<br>( $\epsilon \times 10^{-4}/M^{-1}\ cm^{-1}$ ) <sup>a</sup> | $\lambda_f$ (nm)<br><sup>a</sup> | $E_{HOMO}$<br>(eV) <sup>b</sup> | $E_{0-0}$<br>(eV)<br><sup>c</sup> | $E_{LUMO}$<br>(eV) <sup>d</sup> | $E_{HOMO}$<br>(eV) <sup>e</sup> | $E_{0-0}$<br>(eV) <sup>e</sup> | $E_{LUMO}$<br>(eV) <sup>e</sup> | $T_d$ (°C) <sup>f</sup> |
|-------|------------------------------------------------------------------------------------|----------------------------------|---------------------------------|-----------------------------------|---------------------------------|---------------------------------|--------------------------------|---------------------------------|-------------------------|
| YC-oF | 463 (4.7)                                                                          | 558                              | -5.40                           | 2.37                              | -3.03                           | -4.52                           | 2.75                           | -1.77                           | 368                     |
| YC-mF | 459 (5.3)                                                                          | 555                              | -5.38                           | 2.38                              | -3.00                           | -4.46                           | 2.77                           | -1.69                           | 348                     |
| YC-H  | 468 (4.5)                                                                          | 564                              | -5.33                           | 2.34                              | -2.99                           | -4.41                           | 2.75                           | -1.66                           | 357                     |

<sup>a</sup> Maxima of the absorption and fluorescence band in THF solution; <sup>b</sup> Determined from the differential pulse voltammetry; <sup>c</sup> The value of  $E_{0-0}$  was obtained from the intersection of normalized absorption and photoluminescence spectra; <sup>d</sup> Energy of the LUMO of the compounds estimated by  $E_{HOMO}+E_{0-0}$ ; <sup>e</sup> TDDFT/B3LYP/6-31G(d,p) level calculated values. <sup>f</sup> Decomposition temperatures ( $T_d$ ) observed from TGA.

## References

- [1] K.-M. Lee, Y.-H. Huang, W.-H. Chiu, Y.-K. Huang, G. Chen, G. B. Adugna, S.-R. Li, F. J. Lin, S.-I. Lu, H. C. Hsieh, K.-L. Liao, C.-C. Huang, Y. Tai, Y. T. Tao, Y.-d. Lin, *Adv. Funct. Mater.* 2023, 2306367.
- [2] Y. Le, M. Nitani, M. Ishikawa, K.-I. Nakayama, H. Tada, T. Kaneda, Y. Aso, *Org. Lett.* 2007, 9, 2115-2118.
- [3] H. R. Tseng, H. Phan, C. Luo, M. Wang, L. A. Perez, S. N. Patel, L. Ying, E. J. Kramer, T. Q. Nguyen, G. C. Bazan, A. J. Heeger, *Adv. Mater.* 2014, 26, 2993–2998.
- [4] A. Austin, G. A. Petersson, M. J. Frisch, F. J. Dobek, G. Scalmani, K. Throssell, *J. Chem. Theory Comput.*, 2012, 8, 4989-5007.
- [5] Gaussian 16, Revision A.03, M. J. Frisch, G. W. Trucks, H. B. Schlegel, G. E. Scuseria, M. A. Robb, J. R. Cheeseman, G. Scalmani, V. Barone, G. A. Petersson, H. Nakatsuji, X. Li, M. Caricato, A. V. Marenich, J. Bloino, B. G. Janesko, R. Gomperts, B. Mennucci, H. P. Hratchian, J. V. Ortiz, A. F. Izmaylov, J. L. Sonnenberg, D. Williams-Young, F. Ding, F. Lipparini, F. Egidi, J. Goings, B. Peng, A. Petrone, T. Henderson, D. Ranasinghe, V. G. Zakrzewski, J. Gao, N. Rega, G. Zheng, W. Liang, M. Hada, M. Ehara, K. Toyota, R. Fukuda, J. Hasegawa, M. Ishida, T. Nakajima, Y. Honda, O. Kitao, H. Nakai, T. Vreven, K. Throssell, J. A. Montgomery, Jr., J. E. Peralta, F. Ogliaro, M. J. Bearpark, J. J. Heyd, E. N. Brothers, K. N. Kudin, V. N. Staroverov, T. A. Keith, R. Kobayashi, J. Normand, K. Raghavachari, A. P. Rendell, J. C. Burant, S. S. Iyengar, J. Tomasi, M. Cossi, J. M. Millam, M. Klene, C. Adamo, R. Cammi, J. W. Ochterski, R. L. Martin, K. Morokuma, O. Farkas, J. B. Foresman, and D. J. Fox, Gaussian, Inc., Wallingford CT, 2016.
- [6] J. Tomasi, B. Mennucci, R. Cammi, *Chem. Rev.* 2005, 105, 2999-3093.
- [7] S. Grimme, C. Bannwarth, P. Shushkov, A Robust and Accurate Tight-Binding Quantum Chemical Method for Structures, Vibrational Frequencies, and Noncovalent Interactions of Large Molecular Systems Parametrized for All spd-Block Elements ( $Z = 1-86$ ), *J. Chem. Theory Comput.*, 2017, 13 (5), pp 1989–2009

[8] AMS DFTB 2022.1, SCM, Theoretical Chemistry, Vrije Universiteit, Amsterdam, The Netherlands, <http://www.scm.com>. Optionally, you may add the following list of authors and contributors: R. Rüger, A. Yakovlev, P. Philipson, S. Borini, P. Melix, A.F. Oliveira, M. Franchini, T. van Vuren, T. Soini, M. de Reus, M. Ghorbani Asl, T. Q. Teodoro, D. McCormack, S. Patchkovskii, T. Heine.

[9] AMS 2022.1, SCM, Theoretical Chemistry, Vrije Universiteit, Amsterdam, The Netherlands, <http://www.scm.com>.
